# Supplementary material for: The “Perfect Village” Model as a Result of Research on Transformation of Plant Cover—Case Study of the Puchaczów Commune
Source: MDPI journal article supplement (doi:10.3390/su142114479), 2022-11-04
Supplement: s1 [file s1]

## **Annex 1. ACTUAL VEGETATION IN THE COMMUNE PUCHACZÓW**

In order to identify the actual vegetation in the Puchaczów commune, the authors took 114 phytosociological relevés using the Braun-Blanquet method in the years 2019-2021 [relevé table]. The results of the research made it possible to identify the plant cover and classify phytocoenoses, which provided the basis for a complete floristic analysis. In the described area, 26 plant communities were distinguished. These communities belong to 10 phytosociological classes and represent 17 orders and 20 associations. A detailed classification showing the list of communities and communities is presented below:

### **Class: Stellarietea mediae R.Tx., Lohm. et Prsg 1950**

Order: Centauretalia cyanii R.Tx. 1950

Alliance: Aperion spicae-venti R.Tx. et J.Tx. 1960

1. Ass. Scleranthus annuus

Order: Polygono-Chenopodietalia (R.Tx. et Lohm. 1950) J.Tx. 1961

Alliance: Polygono-Chenopodion Siss. 1946

2. Lamio-Veronicetum politae Kornaś 1950
3. Galinsogo-Setarietum (R.Tx. et Beck. 1942) R.Tx. 1950

Order: Sisymbrietalia J.Tx. 1961

Alliance: Sisymbrium officinalis R. Tx., Lohm. et Prsg 1950

4. Sisymbrietum loeselii Gutte in Rost. et Gutte 1971 em. Eliaš 1979
5. Hordeetum murini Libb. 1933
6. Urtico-Malvetum neglectae (Knapp 1945) Lohm. 1950

### **Class: Epilobietea angustifolii R.Tx. et Prsg 1950**

Order: Atropetalia Vlieg. 1937

Alliance: Epilobion angustifolii (Rübel 1933) Soó 1933

7. Calamagrostietum epigeji Juraszek 1928

Alliance: Sambuco-Salicion R.Tx. et Neum. 1950

8. Sambucetum nigrae Oberd. 1973

### **Class: Artemisietea vulgaris Lohm., Prsg et R. Tx. in R.Tx. 1950**

Order: Onopordetalia acanthii Br.-Bl. et R.Tx. 1943 em. Görs. 1966

Alliance: Dauco-Melilotenion Görs 1966

9. Artemisio-Tanacetetum vulgaris Br.-Bl. 1931 corr. 1949

Order: Artemisietalia vulgaris Lohm. in R.Tx. 1947

Alliance: Arction lappae R.Tx. 1937 em. 1950

10. Arctio-Artemisietum vulgaris Oberd. ex Seybold et Müller 1972

Order: Convolvuletalia sepium R.Tx. 1950

Alliance: Senecion fluviatilis R.Tx. (1947) 1950 em. R.Tx. 1967

11. Rudbeckio-Solidaginetum R.Tx. et Raabe 1950

**Class: Agropyretea intermedio-repentis (Oberd. et all. 1967) Müller et Görs 1969**

Order: Agropyretalia intermedio-repentis (Oberd. et all. 1967) Müller et Görs 1969

Alliance: Convolvulo-Agropyron repentis Görs 1966

12. Convolvulo arvensis-Agropyretum repentis Felföldy 1943

**Class: Phragmitetea R. Tx. et Prsg 1942**

Order: Phragmitetalia Koch 1926

Alliance: Phragmition Koch 1926

13. Phragmitetum australis (Gams 1927) Schmale 1939

14. Typhetum latifoliae Soó 1927

15. Glycerietum maximae Hueck 1931

**Class: Molinio-Arrhenatheretea R.Tx. 1937**

Order: Plantaginetalia majoris R.Tx. (1943) 1950

Alliance: Polygonion avicularis Br.-Bl. 1931 ex Aich. 1933

16. Lolio-Polygonetum arenastri Br.-Bl. 1930 em. Lohm. 1975

Order: Molinietalia caeruleae W. Koch 1926

Alliance: Filipendulion ulmariae Segal 1966

17. Filipendulo-Geranium W.Koch 1926

Alliance: Molinion caeruleae W. Koch 1926

18. Molinietum caeruleae W.Koch 1926

Order: Arrhenatheretalia Pawł. 1928

Alliance: Arrhenatherion elatioris (Br.-Bl. 1925) Koch 1926

19. Arrhenatheretum elatioris Br.-Bl. ex Scherr. 1925

20. Ass. Poa pratensis-Festuca rubra Fijałk. 1962

Alliance: Cynosurion R.Tx. 1947

21. Lolio-Cynosuretum R.Tx. 1937

**Class: Rhamno-Prunetea Rivas Goday et Garb. 1961**

Order: Prunetalia spinosae R.Tx. 1952

Alliance: Pruno-Rubion fruticosi R.Tx. 1952 corr. Doing 1962

22. Rubo fruticosi-Prunetum spinosae Web. 1974 n.inv. Wittig

**Class: Alnetea glutinosae Br.-Bl. et R.Tx. 1943**

Order: Alnetalia glutinosae R.Tx. 1937

Alliance: Alnion glutinosae (Malc. 1929) Meijer Drees 1936

23. Ribeso nigri-Alnetum Sol.-Gór. (1975) 1987

**Class: Vaccinio-Piceetea Br.-Bl. 1939**

Order: Cladonio-Vaccinietalia Kiell.-Lund 1967

Alliance: Dicrano-Pinion W.Mat. 1962

24. Querco roboris-Pinetum (W.Mat. 1981) J.Mat. 1988

**Class: Querco-Fagetea Br.-Bl. et Vlieg. 1937**

Order: Quercetalia pubescenti-petraeae Klika 1933 corr. Moravec in Beg. et Theurill 1984

Alliance: Potentillo albae-Quercion petraeae Zol. et Jakucs n.nov. Jakucs 1967

25. Potentillo albae-Quercetum petraeae Libb. 1933

Order: . Fagetalia sylvaticae Pawł. in Pawł., Sokoł. et Wall. 1928

Alliance: Carpinion betuli Issl. 1931 em. Oberd. 1953

26. Tilio-Carpinetum Tracz. 1962

**Relevé table.** List of plant communities [comp. own 2022]

1 - Ass. *Scleranthus annuus*; 2 - *Lamio-Veronicetum politae*

| Community number                                                                                                                                                         | 1        |          | 2        |          |          |          |          |          |          |          |
|--------------------------------------------------------------------------------------------------------------------------------------------------------------------------|----------|----------|----------|----------|----------|----------|----------|----------|----------|----------|
| Relevé number in table                                                                                                                                                   | 1        | 2        | 3        | 4        | 5        | 6        | 7        | 8        | 9        | 10       |
| Relevé number                                                                                                                                                            | 61       | 62       | 6        | 8        | 28       | 29       | 60       | 63       | 111      | 112      |
| Cover tree and shrubs layer [%]                                                                                                                                          | -        | -        | -        | -        | -        | -        | -        | -        | -        | -        |
| Cover layer herb layer [%]                                                                                                                                               | 50       | 60       | 100      | 100      | 100      | 100      | 100      | 100      | 100      | 100      |
| Area [m <sup>2</sup> ]                                                                                                                                                   | 4        | 6        | 10       | 10       | 15       | 10       | 10       | 10       | 10       | 10       |
| Date                                                                                                                                                                     | 28.06.20 | 28.06.20 | 11.08.19 | 11.08.19 | 25.08.19 | 25.08.19 | 28.06.20 | 28.06.20 | 18.04.21 | 18.04.21 |
| Number of species                                                                                                                                                        | 4        | 4        | 10       | 7        | 9        | 9        | 7        | 11       | 10       | 10       |
| I. Ch: <i>a-Stellarietea mediae</i> ; <i>b-Centauretalia cyanii</i> ; <i>c-Aperion spicae-venti</i> ; <i>d-Polygono-Chenopodietalia</i> ; <i>e -Polygono-Chenopodion</i> |          |          |          |          |          |          |          |          |          |          |
| <i>a Anagallis arvensis</i>                                                                                                                                              | +        | .        | .        | .        | +        | .        | .        | .        | .        | .        |
| <i>a Myosotis arvensis</i>                                                                                                                                               | .        | .        | +        | +        | .        | .        | .        | .        | .        | +        |
| <i>a Polygonum aviculare</i>                                                                                                                                             | .        | .        | .        | .        | .        | +        | .        | .        | +        | .        |
| <i>a Stellaria media</i>                                                                                                                                                 | +        | .        | +        | .        | .        | .        | +        | 1        | .        | .        |
| <i>a Viola arvensis</i>                                                                                                                                                  | .        | .        | .        | .        | .        | +        | .        | .        | .        | .        |
| <i>b Lolium temulentum</i>                                                                                                                                               | .        | .        | .        | .        | +        | .        | .        | .        | +        | .        |
| <i>c Scleranthus annuus</i>                                                                                                                                              | 1        | +        | .        | .        | .        | .        | .        | .        | .        | .        |
| <i>c Apera spica-venti</i>                                                                                                                                               | +        | +        | +        | +        | +        | .        | .        | +        | +        | .        |
| <i>c Vicia angustifolia</i>                                                                                                                                              | .        | +        | .        | .        | .        | .        | .        | .        | .        | +        |
| <i>d Echinochloa crus-galli</i>                                                                                                                                          | .        | .        | .        | .        | .        | +        | +        | +        | .        | .        |
| <i>d Geranium pusillum</i>                                                                                                                                               | .        | .        | +        | +        | +        | .        | .        | .        | +        | +        |
| <i>e Lamium amplexicaule</i>                                                                                                                                             | .        | .        | +        | +        | .        | .        | .        | +        | .        | +        |
| <i>e Lamium purpureum</i>                                                                                                                                                | .        | .        | 1        | 1        | 2        | 1        | 3        | 2        | 2        | 1        |
| <i>e Sonchus oleraceus</i>                                                                                                                                               | .        | .        | .        | .        | .        | +        | +        | +        | .        | .        |
| <i>e Veronica agrestis</i>                                                                                                                                               | .        | .        | 4        | 3        | 2        | 5        | 3        | 3        | 3        | 2        |
| <i>e Veronica polita</i>                                                                                                                                                 | .        | .        | .        | .        | +        | .        | .        | .        | .        | +        |

|                                                                                                                                 |   |   |   |   |   |   |   |   |   |
|---------------------------------------------------------------------------------------------------------------------------------|---|---|---|---|---|---|---|---|---|
| II. Ch: <i>Molinio-Arrhenatheretea</i>                                                                                          |   |   |   |   |   |   |   |   |   |
| <i>Poa pratensis</i>                                                                                                            | . | . | . | . | + | . | + | + | . |
| <i>Festuca rubra</i>                                                                                                            | . | . | . | + | . | . | . | . | . |
| <i>Trifolium pratense</i>                                                                                                       | . | . | . | . | . | . | . | + | + |
| III. Ch: <i>Artemisietea vulgaris</i>                                                                                           |   |   |   |   |   |   |   |   |   |
| <i>Urtica dioica</i>                                                                                                            | . | . | + | . | . | + | + | . | . |
| <i>Artemisia vulgaris</i>                                                                                                       | . | . | . | . | . | . | + | + | + |
| IV. Ch: <i>Agropyretea intermedio-repentis</i>                                                                                  |   |   |   |   |   |   |   |   |   |
| <i>Convolvulus arvensis</i>                                                                                                     | . | . | . | + | + | . | . | . | . |
| <i>Poa angustifolia</i>                                                                                                         | . | . | + | . | . | . | . | + | + |
| V. Other:                                                                                                                       |   |   |   |   |   |   |   |   |   |
| <i>Polygonum persicaria</i>                                                                                                     | . | . | . | . | . | + | + | . | + |
| <i>Conyza canadensis</i>                                                                                                        | . | + | + | . | . | . | . | + | . |
| Occasional species: IV- <i>Bromus inermis</i> +/III; Ia- <i>Veronica arvensis</i> +/9;<br>III- <i>Taraxacum officinale</i> +/10 |   |   |   |   |   |   |   |   |   |

### 3 - *Galinsogo-Setarietum*

|                                 |          |          |          |          |          |          |
|---------------------------------|----------|----------|----------|----------|----------|----------|
| Community number                | 3        |          |          |          |          |          |
| Relevé number in table          | 1        | 2        | 3        | 4        | 5        | 6        |
| Relevé number                   | 9        | 32       | 54       | 71       | 82       | 109      |
| Cover tree and shrubs layer [%] | -        | -        | -        | -        | -        | -        |
| Cover layer herb layer [%]      | 100      | 100      | 90       | 100      | 90       | 90       |
| Area [m2]                       | 10       | 10       | 10       | 15       | 20       | 10       |
| Date                            | 11.08.19 | 25.08.19 | 28.06.20 | 08.08.20 | 30.08.20 | 18.04.21 |
| Number of species               | 11       | 7        | 10       | 7        | 6        | 8        |

|                                                                                                                                                                                                            |   |   |   |   |   |   |
|------------------------------------------------------------------------------------------------------------------------------------------------------------------------------------------------------------|---|---|---|---|---|---|
| I. Ch: <i>a-Stellarietea mediae</i> ; <i>b-Polygono-Chenopodietalia</i> ;<br><i>c -Polygono-Chenopodion</i>                                                                                                |   |   |   |   |   |   |
| <i>a Polygonum aviculare</i>                                                                                                                                                                               | + | . | . | + | . | . |
| <i>a Crepis tectorum</i>                                                                                                                                                                                   | . | . | + | . | . | + |
| <i>b Echinochloa crus-galli</i>                                                                                                                                                                            | . | . | . | + | + | . |
| <i>b Galinsoga ciliata</i>                                                                                                                                                                                 | 2 | + | . | . | 1 | . |
| <i>b Galinsoga parviflora</i>                                                                                                                                                                              | 3 | 4 | 5 | 4 | 3 | 4 |
| <i>b Geranium pusillum</i>                                                                                                                                                                                 | . | + | + | . | . | + |
| <i>c Lamium purpureum</i>                                                                                                                                                                                  | + | . | + | . | + | + |
| <i>c Sonchus oleraceus</i>                                                                                                                                                                                 | + | + | + | . | . | + |
| II. Ch: <i>a-Artemisietalia vulgaris</i> , <i>b-Glechometalia hederaceae</i>                                                                                                                               |   |   |   |   |   |   |
| <i>a Arctium lappa</i>                                                                                                                                                                                     | + | . | . | + | . | . |
| <i>a Urtica dioica</i>                                                                                                                                                                                     | + | + | + | . | . | . |
| <i>b Glechoma hederaceae</i>                                                                                                                                                                               | + | + | . | . | + | . |
| III. Ch: <i>Polygonion avicularis</i>                                                                                                                                                                      |   |   |   |   |   |   |
| <i>Chamomilla suaveolens</i>                                                                                                                                                                               | . | . | + | . | . | + |
| <i>Lolium perenne</i>                                                                                                                                                                                      | . | . | . | + | . | + |
| IV. Ch: <i>Agropyretea intermedio-repentis</i>                                                                                                                                                             |   |   |   |   |   |   |
| <i>Convolvulus arvensis</i>                                                                                                                                                                                | . | + | + | . | . | . |
| <i>Poa angustifolia</i>                                                                                                                                                                                    | . | . | + | . | . | . |
| V. Ch: <i>Koelerio glaucae-Coryneporetea canescentis</i>                                                                                                                                                   |   |   |   |   |   |   |
| <i>Rumex acetosella</i>                                                                                                                                                                                    | . | . | + | . | . | + |
| <i>Trifolium arvense</i>                                                                                                                                                                                   | + | . | . | . | + | . |
| VI. Other:                                                                                                                                                                                                 |   |   |   |   |   |   |
| <i>Urtica urens</i>                                                                                                                                                                                        | + | . | . | + | . | . |
| <i>Malva neglecta</i>                                                                                                                                                                                      | + | . | . | + | . | . |
| Occasional species: <i>Ia - Amaranthus albus</i> +1/, <i>VI- Impatiens parviflora</i> +/2;<br><i>Calystegia sepium</i> r/4; <i>Brassica napus</i> +/4; <i>Cirsium arvense</i> r/6; <i>Vicia sepium</i> +/6 |   |   |   |   |   |   |

4 - *Sisymbrietum loeselii*; 5 - *Hordeetum murini*

| Community number                                                                                                                                                                                                                                                                                                                                                                                                                                                                                                                                                                                                                                                                                                                                                                                                                                                                                                                                                                                                                                                                                                                                                                                                                                                                                                                                                                                                                                                                                                                                                                                                                                                                                                                                                                                                                                                                                                                                                                                                                                                                                                                                                                                                                                                                                            | 4        |          |          |          |          | 5        |          |          |          |                         |   |   |   |   |   |   |   |   |   |                             |   |   |   |   |   |   |   |   |   |                          |   |   |   |   |   |   |   |   |   |                               |   |   |   |   |   |   |   |   |   |                          |   |   |   |   |   |   |   |   |   |                            |   |   |   |   |   |   |   |   |   |                        |   |   |   |   |   |   |   |   |   |                              |   |   |   |   |   |   |   |   |   |                                |   |   |   |   |   |   |   |   |   |                           |   |   |   |   |   |   |   |   |   |                          |   |   |   |   |   |   |   |   |   |                            |   |   |   |   |   |   |   |   |   |                        |   |   |   |   |   |   |   |   |   |                             |   |   |   |   |   |   |   |   |   |
|-------------------------------------------------------------------------------------------------------------------------------------------------------------------------------------------------------------------------------------------------------------------------------------------------------------------------------------------------------------------------------------------------------------------------------------------------------------------------------------------------------------------------------------------------------------------------------------------------------------------------------------------------------------------------------------------------------------------------------------------------------------------------------------------------------------------------------------------------------------------------------------------------------------------------------------------------------------------------------------------------------------------------------------------------------------------------------------------------------------------------------------------------------------------------------------------------------------------------------------------------------------------------------------------------------------------------------------------------------------------------------------------------------------------------------------------------------------------------------------------------------------------------------------------------------------------------------------------------------------------------------------------------------------------------------------------------------------------------------------------------------------------------------------------------------------------------------------------------------------------------------------------------------------------------------------------------------------------------------------------------------------------------------------------------------------------------------------------------------------------------------------------------------------------------------------------------------------------------------------------------------------------------------------------------------------|----------|----------|----------|----------|----------|----------|----------|----------|----------|-------------------------|---|---|---|---|---|---|---|---|---|-----------------------------|---|---|---|---|---|---|---|---|---|--------------------------|---|---|---|---|---|---|---|---|---|-------------------------------|---|---|---|---|---|---|---|---|---|--------------------------|---|---|---|---|---|---|---|---|---|----------------------------|---|---|---|---|---|---|---|---|---|------------------------|---|---|---|---|---|---|---|---|---|------------------------------|---|---|---|---|---|---|---|---|---|--------------------------------|---|---|---|---|---|---|---|---|---|---------------------------|---|---|---|---|---|---|---|---|---|--------------------------|---|---|---|---|---|---|---|---|---|----------------------------|---|---|---|---|---|---|---|---|---|------------------------|---|---|---|---|---|---|---|---|---|-----------------------------|---|---|---|---|---|---|---|---|---|
| Relevé number in table                                                                                                                                                                                                                                                                                                                                                                                                                                                                                                                                                                                                                                                                                                                                                                                                                                                                                                                                                                                                                                                                                                                                                                                                                                                                                                                                                                                                                                                                                                                                                                                                                                                                                                                                                                                                                                                                                                                                                                                                                                                                                                                                                                                                                                                                                      | 1        | 2        | 3        | 4        | 5        | 6        | 7        | 8        | 9        |                         |   |   |   |   |   |   |   |   |   |                             |   |   |   |   |   |   |   |   |   |                          |   |   |   |   |   |   |   |   |   |                               |   |   |   |   |   |   |   |   |   |                          |   |   |   |   |   |   |   |   |   |                            |   |   |   |   |   |   |   |   |   |                        |   |   |   |   |   |   |   |   |   |                              |   |   |   |   |   |   |   |   |   |                                |   |   |   |   |   |   |   |   |   |                           |   |   |   |   |   |   |   |   |   |                          |   |   |   |   |   |   |   |   |   |                            |   |   |   |   |   |   |   |   |   |                        |   |   |   |   |   |   |   |   |   |                             |   |   |   |   |   |   |   |   |   |
| Relevé number                                                                                                                                                                                                                                                                                                                                                                                                                                                                                                                                                                                                                                                                                                                                                                                                                                                                                                                                                                                                                                                                                                                                                                                                                                                                                                                                                                                                                                                                                                                                                                                                                                                                                                                                                                                                                                                                                                                                                                                                                                                                                                                                                                                                                                                                                               | 4        | 31       | 72       | 81       | 110      | 13       | 14       | 18       | 74       |                         |   |   |   |   |   |   |   |   |   |                             |   |   |   |   |   |   |   |   |   |                          |   |   |   |   |   |   |   |   |   |                               |   |   |   |   |   |   |   |   |   |                          |   |   |   |   |   |   |   |   |   |                            |   |   |   |   |   |   |   |   |   |                        |   |   |   |   |   |   |   |   |   |                              |   |   |   |   |   |   |   |   |   |                                |   |   |   |   |   |   |   |   |   |                           |   |   |   |   |   |   |   |   |   |                          |   |   |   |   |   |   |   |   |   |                            |   |   |   |   |   |   |   |   |   |                        |   |   |   |   |   |   |   |   |   |                             |   |   |   |   |   |   |   |   |   |
| Cover tree and shrubs layer [%]                                                                                                                                                                                                                                                                                                                                                                                                                                                                                                                                                                                                                                                                                                                                                                                                                                                                                                                                                                                                                                                                                                                                                                                                                                                                                                                                                                                                                                                                                                                                                                                                                                                                                                                                                                                                                                                                                                                                                                                                                                                                                                                                                                                                                                                                             | -        | -        | -        | -        | -        | -        | -        | -        | -        |                         |   |   |   |   |   |   |   |   |   |                             |   |   |   |   |   |   |   |   |   |                          |   |   |   |   |   |   |   |   |   |                               |   |   |   |   |   |   |   |   |   |                          |   |   |   |   |   |   |   |   |   |                            |   |   |   |   |   |   |   |   |   |                        |   |   |   |   |   |   |   |   |   |                              |   |   |   |   |   |   |   |   |   |                                |   |   |   |   |   |   |   |   |   |                           |   |   |   |   |   |   |   |   |   |                          |   |   |   |   |   |   |   |   |   |                            |   |   |   |   |   |   |   |   |   |                        |   |   |   |   |   |   |   |   |   |                             |   |   |   |   |   |   |   |   |   |
| Cover layer herb layer [%]                                                                                                                                                                                                                                                                                                                                                                                                                                                                                                                                                                                                                                                                                                                                                                                                                                                                                                                                                                                                                                                                                                                                                                                                                                                                                                                                                                                                                                                                                                                                                                                                                                                                                                                                                                                                                                                                                                                                                                                                                                                                                                                                                                                                                                                                                  | 95       | 90       | 100      | 100      | 100      | 100      | 95       | 100      | 100      |                         |   |   |   |   |   |   |   |   |   |                             |   |   |   |   |   |   |   |   |   |                          |   |   |   |   |   |   |   |   |   |                               |   |   |   |   |   |   |   |   |   |                          |   |   |   |   |   |   |   |   |   |                            |   |   |   |   |   |   |   |   |   |                        |   |   |   |   |   |   |   |   |   |                              |   |   |   |   |   |   |   |   |   |                                |   |   |   |   |   |   |   |   |   |                           |   |   |   |   |   |   |   |   |   |                          |   |   |   |   |   |   |   |   |   |                            |   |   |   |   |   |   |   |   |   |                        |   |   |   |   |   |   |   |   |   |                             |   |   |   |   |   |   |   |   |   |
| Area [m2]                                                                                                                                                                                                                                                                                                                                                                                                                                                                                                                                                                                                                                                                                                                                                                                                                                                                                                                                                                                                                                                                                                                                                                                                                                                                                                                                                                                                                                                                                                                                                                                                                                                                                                                                                                                                                                                                                                                                                                                                                                                                                                                                                                                                                                                                                                   | 25       | 10       | 20       | 15       | 10       | 10       | 10       | 15       | 15       |                         |   |   |   |   |   |   |   |   |   |                             |   |   |   |   |   |   |   |   |   |                          |   |   |   |   |   |   |   |   |   |                               |   |   |   |   |   |   |   |   |   |                          |   |   |   |   |   |   |   |   |   |                            |   |   |   |   |   |   |   |   |   |                        |   |   |   |   |   |   |   |   |   |                              |   |   |   |   |   |   |   |   |   |                                |   |   |   |   |   |   |   |   |   |                           |   |   |   |   |   |   |   |   |   |                          |   |   |   |   |   |   |   |   |   |                            |   |   |   |   |   |   |   |   |   |                        |   |   |   |   |   |   |   |   |   |                             |   |   |   |   |   |   |   |   |   |
| Date                                                                                                                                                                                                                                                                                                                                                                                                                                                                                                                                                                                                                                                                                                                                                                                                                                                                                                                                                                                                                                                                                                                                                                                                                                                                                                                                                                                                                                                                                                                                                                                                                                                                                                                                                                                                                                                                                                                                                                                                                                                                                                                                                                                                                                                                                                        | 11.08.19 | 25.08.19 | 08.08.20 | 30.08.20 | 30.08.20 | 25.08.19 | 25.08.19 | 25.08.19 | 08.08.20 |                         |   |   |   |   |   |   |   |   |   |                             |   |   |   |   |   |   |   |   |   |                          |   |   |   |   |   |   |   |   |   |                               |   |   |   |   |   |   |   |   |   |                          |   |   |   |   |   |   |   |   |   |                            |   |   |   |   |   |   |   |   |   |                        |   |   |   |   |   |   |   |   |   |                              |   |   |   |   |   |   |   |   |   |                                |   |   |   |   |   |   |   |   |   |                           |   |   |   |   |   |   |   |   |   |                          |   |   |   |   |   |   |   |   |   |                            |   |   |   |   |   |   |   |   |   |                        |   |   |   |   |   |   |   |   |   |                             |   |   |   |   |   |   |   |   |   |
| Number of species                                                                                                                                                                                                                                                                                                                                                                                                                                                                                                                                                                                                                                                                                                                                                                                                                                                                                                                                                                                                                                                                                                                                                                                                                                                                                                                                                                                                                                                                                                                                                                                                                                                                                                                                                                                                                                                                                                                                                                                                                                                                                                                                                                                                                                                                                           | 9        | 8        | 12       | 12       | 8        | 6        | 4        | 6        | 5        |                         |   |   |   |   |   |   |   |   |   |                             |   |   |   |   |   |   |   |   |   |                          |   |   |   |   |   |   |   |   |   |                               |   |   |   |   |   |   |   |   |   |                          |   |   |   |   |   |   |   |   |   |                            |   |   |   |   |   |   |   |   |   |                        |   |   |   |   |   |   |   |   |   |                              |   |   |   |   |   |   |   |   |   |                                |   |   |   |   |   |   |   |   |   |                           |   |   |   |   |   |   |   |   |   |                          |   |   |   |   |   |   |   |   |   |                            |   |   |   |   |   |   |   |   |   |                        |   |   |   |   |   |   |   |   |   |                             |   |   |   |   |   |   |   |   |   |
| <p>I. Ch: <i>a-Stellarietea mediae</i>; <i>b- Sisymbrietalia</i>;<br/> <i>c-Polygono-Chenopodietalia</i>; <i>d -Polygono-Chenopodion</i></p> <table> <tr> <td><i>a Viola arvensis</i></td><td>.</td><td>+</td><td>.</td><td>.</td><td>+</td><td>.</td><td>.</td><td>.</td><td>.</td></tr> <tr> <td><i>a Anagallis arvensis</i></td><td>+</td><td>.</td><td>.</td><td>+</td><td>.</td><td>.</td><td>.</td><td>+</td><td>.</td></tr> <tr> <td><i>a Bromus sterilis</i></td><td>.</td><td>.</td><td>.</td><td>.</td><td>.</td><td>3</td><td>2</td><td>2</td><td>2</td></tr> <tr> <td><i>a Fallopia convolvulus</i></td><td>.</td><td>.</td><td>.</td><td>+</td><td>+</td><td>.</td><td>.</td><td>.</td><td>.</td></tr> <tr> <td><i>a Hordeum murinum</i></td><td>.</td><td>.</td><td>.</td><td>.</td><td>.</td><td>+</td><td>.</td><td>+</td><td>+</td></tr> <tr> <td><i>a Myosotis arvensis</i></td><td>+</td><td>+</td><td>.</td><td>.</td><td>.</td><td>+</td><td>.</td><td>.</td><td>+</td></tr> <tr> <td><i>a Vicia hirsuta</i></td><td>.</td><td>.</td><td>+</td><td>+</td><td>.</td><td>+</td><td>+</td><td>.</td><td>.</td></tr> <tr> <td><i>b Sisymbrium loeselii</i></td><td>5</td><td>4</td><td>5</td><td>4</td><td>3</td><td>.</td><td>.</td><td>.</td><td>.</td></tr> <tr> <td><i>b Sisymbrium officinale</i></td><td>.</td><td>+</td><td>+</td><td>.</td><td>.</td><td>.</td><td>.</td><td>.</td><td>.</td></tr> <tr> <td><i>c Sonchus arvensis</i></td><td>+</td><td>.</td><td>.</td><td>+</td><td>+</td><td>.</td><td>.</td><td>+</td><td>.</td></tr> <tr> <td><i>c Stellaria media</i></td><td>.</td><td>.</td><td>+</td><td>+</td><td>.</td><td>+</td><td>.</td><td>.</td><td>.</td></tr> <tr> <td><i>d Sonchus oleraceus</i></td><td>.</td><td>.</td><td>+</td><td>.</td><td>+</td><td>.</td><td>.</td><td>.</td><td>+</td></tr> </table> <p>II.Ch: <i>a-Molinio-Arrhenatheretea</i>; <i>b-Polygonion avicularis</i>; <i>c-Arrhenatheretalia</i>;<br/> <i>d- Arrhenatherion elatioris</i></p> <table> <tr> <td><i>a Poa pratensis</i></td><td>.</td><td>.</td><td>+</td><td>+</td><td>.</td><td>+</td><td>.</td><td>.</td><td>.</td></tr> <tr> <td><i>a Trifolium pratense</i></td><td>+</td><td>.</td><td>.</td><td>+</td><td>.</td><td>.</td><td>.</td><td>.</td><td>.</td></tr> </table> |          |          |          |          |          |          |          |          |          | <i>a Viola arvensis</i> | . | + | . | . | + | . | . | . | . | <i>a Anagallis arvensis</i> | + | . | . | + | . | . | . | + | . | <i>a Bromus sterilis</i> | . | . | . | . | . | 3 | 2 | 2 | 2 | <i>a Fallopia convolvulus</i> | . | . | . | + | + | . | . | . | . | <i>a Hordeum murinum</i> | . | . | . | . | . | + | . | + | + | <i>a Myosotis arvensis</i> | + | + | . | . | . | + | . | . | + | <i>a Vicia hirsuta</i> | . | . | + | + | . | + | + | . | . | <i>b Sisymbrium loeselii</i> | 5 | 4 | 5 | 4 | 3 | . | . | . | . | <i>b Sisymbrium officinale</i> | . | + | + | . | . | . | . | . | . | <i>c Sonchus arvensis</i> | + | . | . | + | + | . | . | + | . | <i>c Stellaria media</i> | . | . | + | + | . | + | . | . | . | <i>d Sonchus oleraceus</i> | . | . | + | . | + | . | . | . | + | <i>a Poa pratensis</i> | . | . | + | + | . | + | . | . | . | <i>a Trifolium pratense</i> | + | . | . | + | . | . | . | . | . |
| <i>a Viola arvensis</i>                                                                                                                                                                                                                                                                                                                                                                                                                                                                                                                                                                                                                                                                                                                                                                                                                                                                                                                                                                                                                                                                                                                                                                                                                                                                                                                                                                                                                                                                                                                                                                                                                                                                                                                                                                                                                                                                                                                                                                                                                                                                                                                                                                                                                                                                                     | .        | +        | .        | .        | +        | .        | .        | .        | .        |                         |   |   |   |   |   |   |   |   |   |                             |   |   |   |   |   |   |   |   |   |                          |   |   |   |   |   |   |   |   |   |                               |   |   |   |   |   |   |   |   |   |                          |   |   |   |   |   |   |   |   |   |                            |   |   |   |   |   |   |   |   |   |                        |   |   |   |   |   |   |   |   |   |                              |   |   |   |   |   |   |   |   |   |                                |   |   |   |   |   |   |   |   |   |                           |   |   |   |   |   |   |   |   |   |                          |   |   |   |   |   |   |   |   |   |                            |   |   |   |   |   |   |   |   |   |                        |   |   |   |   |   |   |   |   |   |                             |   |   |   |   |   |   |   |   |   |
| <i>a Anagallis arvensis</i>                                                                                                                                                                                                                                                                                                                                                                                                                                                                                                                                                                                                                                                                                                                                                                                                                                                                                                                                                                                                                                                                                                                                                                                                                                                                                                                                                                                                                                                                                                                                                                                                                                                                                                                                                                                                                                                                                                                                                                                                                                                                                                                                                                                                                                                                                 | +        | .        | .        | +        | .        | .        | .        | +        | .        |                         |   |   |   |   |   |   |   |   |   |                             |   |   |   |   |   |   |   |   |   |                          |   |   |   |   |   |   |   |   |   |                               |   |   |   |   |   |   |   |   |   |                          |   |   |   |   |   |   |   |   |   |                            |   |   |   |   |   |   |   |   |   |                        |   |   |   |   |   |   |   |   |   |                              |   |   |   |   |   |   |   |   |   |                                |   |   |   |   |   |   |   |   |   |                           |   |   |   |   |   |   |   |   |   |                          |   |   |   |   |   |   |   |   |   |                            |   |   |   |   |   |   |   |   |   |                        |   |   |   |   |   |   |   |   |   |                             |   |   |   |   |   |   |   |   |   |
| <i>a Bromus sterilis</i>                                                                                                                                                                                                                                                                                                                                                                                                                                                                                                                                                                                                                                                                                                                                                                                                                                                                                                                                                                                                                                                                                                                                                                                                                                                                                                                                                                                                                                                                                                                                                                                                                                                                                                                                                                                                                                                                                                                                                                                                                                                                                                                                                                                                                                                                                    | .        | .        | .        | .        | .        | 3        | 2        | 2        | 2        |                         |   |   |   |   |   |   |   |   |   |                             |   |   |   |   |   |   |   |   |   |                          |   |   |   |   |   |   |   |   |   |                               |   |   |   |   |   |   |   |   |   |                          |   |   |   |   |   |   |   |   |   |                            |   |   |   |   |   |   |   |   |   |                        |   |   |   |   |   |   |   |   |   |                              |   |   |   |   |   |   |   |   |   |                                |   |   |   |   |   |   |   |   |   |                           |   |   |   |   |   |   |   |   |   |                          |   |   |   |   |   |   |   |   |   |                            |   |   |   |   |   |   |   |   |   |                        |   |   |   |   |   |   |   |   |   |                             |   |   |   |   |   |   |   |   |   |
| <i>a Fallopia convolvulus</i>                                                                                                                                                                                                                                                                                                                                                                                                                                                                                                                                                                                                                                                                                                                                                                                                                                                                                                                                                                                                                                                                                                                                                                                                                                                                                                                                                                                                                                                                                                                                                                                                                                                                                                                                                                                                                                                                                                                                                                                                                                                                                                                                                                                                                                                                               | .        | .        | .        | +        | +        | .        | .        | .        | .        |                         |   |   |   |   |   |   |   |   |   |                             |   |   |   |   |   |   |   |   |   |                          |   |   |   |   |   |   |   |   |   |                               |   |   |   |   |   |   |   |   |   |                          |   |   |   |   |   |   |   |   |   |                            |   |   |   |   |   |   |   |   |   |                        |   |   |   |   |   |   |   |   |   |                              |   |   |   |   |   |   |   |   |   |                                |   |   |   |   |   |   |   |   |   |                           |   |   |   |   |   |   |   |   |   |                          |   |   |   |   |   |   |   |   |   |                            |   |   |   |   |   |   |   |   |   |                        |   |   |   |   |   |   |   |   |   |                             |   |   |   |   |   |   |   |   |   |
| <i>a Hordeum murinum</i>                                                                                                                                                                                                                                                                                                                                                                                                                                                                                                                                                                                                                                                                                                                                                                                                                                                                                                                                                                                                                                                                                                                                                                                                                                                                                                                                                                                                                                                                                                                                                                                                                                                                                                                                                                                                                                                                                                                                                                                                                                                                                                                                                                                                                                                                                    | .        | .        | .        | .        | .        | +        | .        | +        | +        |                         |   |   |   |   |   |   |   |   |   |                             |   |   |   |   |   |   |   |   |   |                          |   |   |   |   |   |   |   |   |   |                               |   |   |   |   |   |   |   |   |   |                          |   |   |   |   |   |   |   |   |   |                            |   |   |   |   |   |   |   |   |   |                        |   |   |   |   |   |   |   |   |   |                              |   |   |   |   |   |   |   |   |   |                                |   |   |   |   |   |   |   |   |   |                           |   |   |   |   |   |   |   |   |   |                          |   |   |   |   |   |   |   |   |   |                            |   |   |   |   |   |   |   |   |   |                        |   |   |   |   |   |   |   |   |   |                             |   |   |   |   |   |   |   |   |   |
| <i>a Myosotis arvensis</i>                                                                                                                                                                                                                                                                                                                                                                                                                                                                                                                                                                                                                                                                                                                                                                                                                                                                                                                                                                                                                                                                                                                                                                                                                                                                                                                                                                                                                                                                                                                                                                                                                                                                                                                                                                                                                                                                                                                                                                                                                                                                                                                                                                                                                                                                                  | +        | +        | .        | .        | .        | +        | .        | .        | +        |                         |   |   |   |   |   |   |   |   |   |                             |   |   |   |   |   |   |   |   |   |                          |   |   |   |   |   |   |   |   |   |                               |   |   |   |   |   |   |   |   |   |                          |   |   |   |   |   |   |   |   |   |                            |   |   |   |   |   |   |   |   |   |                        |   |   |   |   |   |   |   |   |   |                              |   |   |   |   |   |   |   |   |   |                                |   |   |   |   |   |   |   |   |   |                           |   |   |   |   |   |   |   |   |   |                          |   |   |   |   |   |   |   |   |   |                            |   |   |   |   |   |   |   |   |   |                        |   |   |   |   |   |   |   |   |   |                             |   |   |   |   |   |   |   |   |   |
| <i>a Vicia hirsuta</i>                                                                                                                                                                                                                                                                                                                                                                                                                                                                                                                                                                                                                                                                                                                                                                                                                                                                                                                                                                                                                                                                                                                                                                                                                                                                                                                                                                                                                                                                                                                                                                                                                                                                                                                                                                                                                                                                                                                                                                                                                                                                                                                                                                                                                                                                                      | .        | .        | +        | +        | .        | +        | +        | .        | .        |                         |   |   |   |   |   |   |   |   |   |                             |   |   |   |   |   |   |   |   |   |                          |   |   |   |   |   |   |   |   |   |                               |   |   |   |   |   |   |   |   |   |                          |   |   |   |   |   |   |   |   |   |                            |   |   |   |   |   |   |   |   |   |                        |   |   |   |   |   |   |   |   |   |                              |   |   |   |   |   |   |   |   |   |                                |   |   |   |   |   |   |   |   |   |                           |   |   |   |   |   |   |   |   |   |                          |   |   |   |   |   |   |   |   |   |                            |   |   |   |   |   |   |   |   |   |                        |   |   |   |   |   |   |   |   |   |                             |   |   |   |   |   |   |   |   |   |
| <i>b Sisymbrium loeselii</i>                                                                                                                                                                                                                                                                                                                                                                                                                                                                                                                                                                                                                                                                                                                                                                                                                                                                                                                                                                                                                                                                                                                                                                                                                                                                                                                                                                                                                                                                                                                                                                                                                                                                                                                                                                                                                                                                                                                                                                                                                                                                                                                                                                                                                                                                                | 5        | 4        | 5        | 4        | 3        | .        | .        | .        | .        |                         |   |   |   |   |   |   |   |   |   |                             |   |   |   |   |   |   |   |   |   |                          |   |   |   |   |   |   |   |   |   |                               |   |   |   |   |   |   |   |   |   |                          |   |   |   |   |   |   |   |   |   |                            |   |   |   |   |   |   |   |   |   |                        |   |   |   |   |   |   |   |   |   |                              |   |   |   |   |   |   |   |   |   |                                |   |   |   |   |   |   |   |   |   |                           |   |   |   |   |   |   |   |   |   |                          |   |   |   |   |   |   |   |   |   |                            |   |   |   |   |   |   |   |   |   |                        |   |   |   |   |   |   |   |   |   |                             |   |   |   |   |   |   |   |   |   |
| <i>b Sisymbrium officinale</i>                                                                                                                                                                                                                                                                                                                                                                                                                                                                                                                                                                                                                                                                                                                                                                                                                                                                                                                                                                                                                                                                                                                                                                                                                                                                                                                                                                                                                                                                                                                                                                                                                                                                                                                                                                                                                                                                                                                                                                                                                                                                                                                                                                                                                                                                              | .        | +        | +        | .        | .        | .        | .        | .        | .        |                         |   |   |   |   |   |   |   |   |   |                             |   |   |   |   |   |   |   |   |   |                          |   |   |   |   |   |   |   |   |   |                               |   |   |   |   |   |   |   |   |   |                          |   |   |   |   |   |   |   |   |   |                            |   |   |   |   |   |   |   |   |   |                        |   |   |   |   |   |   |   |   |   |                              |   |   |   |   |   |   |   |   |   |                                |   |   |   |   |   |   |   |   |   |                           |   |   |   |   |   |   |   |   |   |                          |   |   |   |   |   |   |   |   |   |                            |   |   |   |   |   |   |   |   |   |                        |   |   |   |   |   |   |   |   |   |                             |   |   |   |   |   |   |   |   |   |
| <i>c Sonchus arvensis</i>                                                                                                                                                                                                                                                                                                                                                                                                                                                                                                                                                                                                                                                                                                                                                                                                                                                                                                                                                                                                                                                                                                                                                                                                                                                                                                                                                                                                                                                                                                                                                                                                                                                                                                                                                                                                                                                                                                                                                                                                                                                                                                                                                                                                                                                                                   | +        | .        | .        | +        | +        | .        | .        | +        | .        |                         |   |   |   |   |   |   |   |   |   |                             |   |   |   |   |   |   |   |   |   |                          |   |   |   |   |   |   |   |   |   |                               |   |   |   |   |   |   |   |   |   |                          |   |   |   |   |   |   |   |   |   |                            |   |   |   |   |   |   |   |   |   |                        |   |   |   |   |   |   |   |   |   |                              |   |   |   |   |   |   |   |   |   |                                |   |   |   |   |   |   |   |   |   |                           |   |   |   |   |   |   |   |   |   |                          |   |   |   |   |   |   |   |   |   |                            |   |   |   |   |   |   |   |   |   |                        |   |   |   |   |   |   |   |   |   |                             |   |   |   |   |   |   |   |   |   |
| <i>c Stellaria media</i>                                                                                                                                                                                                                                                                                                                                                                                                                                                                                                                                                                                                                                                                                                                                                                                                                                                                                                                                                                                                                                                                                                                                                                                                                                                                                                                                                                                                                                                                                                                                                                                                                                                                                                                                                                                                                                                                                                                                                                                                                                                                                                                                                                                                                                                                                    | .        | .        | +        | +        | .        | +        | .        | .        | .        |                         |   |   |   |   |   |   |   |   |   |                             |   |   |   |   |   |   |   |   |   |                          |   |   |   |   |   |   |   |   |   |                               |   |   |   |   |   |   |   |   |   |                          |   |   |   |   |   |   |   |   |   |                            |   |   |   |   |   |   |   |   |   |                        |   |   |   |   |   |   |   |   |   |                              |   |   |   |   |   |   |   |   |   |                                |   |   |   |   |   |   |   |   |   |                           |   |   |   |   |   |   |   |   |   |                          |   |   |   |   |   |   |   |   |   |                            |   |   |   |   |   |   |   |   |   |                        |   |   |   |   |   |   |   |   |   |                             |   |   |   |   |   |   |   |   |   |
| <i>d Sonchus oleraceus</i>                                                                                                                                                                                                                                                                                                                                                                                                                                                                                                                                                                                                                                                                                                                                                                                                                                                                                                                                                                                                                                                                                                                                                                                                                                                                                                                                                                                                                                                                                                                                                                                                                                                                                                                                                                                                                                                                                                                                                                                                                                                                                                                                                                                                                                                                                  | .        | .        | +        | .        | +        | .        | .        | .        | +        |                         |   |   |   |   |   |   |   |   |   |                             |   |   |   |   |   |   |   |   |   |                          |   |   |   |   |   |   |   |   |   |                               |   |   |   |   |   |   |   |   |   |                          |   |   |   |   |   |   |   |   |   |                            |   |   |   |   |   |   |   |   |   |                        |   |   |   |   |   |   |   |   |   |                              |   |   |   |   |   |   |   |   |   |                                |   |   |   |   |   |   |   |   |   |                           |   |   |   |   |   |   |   |   |   |                          |   |   |   |   |   |   |   |   |   |                            |   |   |   |   |   |   |   |   |   |                        |   |   |   |   |   |   |   |   |   |                             |   |   |   |   |   |   |   |   |   |
| <i>a Poa pratensis</i>                                                                                                                                                                                                                                                                                                                                                                                                                                                                                                                                                                                                                                                                                                                                                                                                                                                                                                                                                                                                                                                                                                                                                                                                                                                                                                                                                                                                                                                                                                                                                                                                                                                                                                                                                                                                                                                                                                                                                                                                                                                                                                                                                                                                                                                                                      | .        | .        | +        | +        | .        | +        | .        | .        | .        |                         |   |   |   |   |   |   |   |   |   |                             |   |   |   |   |   |   |   |   |   |                          |   |   |   |   |   |   |   |   |   |                               |   |   |   |   |   |   |   |   |   |                          |   |   |   |   |   |   |   |   |   |                            |   |   |   |   |   |   |   |   |   |                        |   |   |   |   |   |   |   |   |   |                              |   |   |   |   |   |   |   |   |   |                                |   |   |   |   |   |   |   |   |   |                           |   |   |   |   |   |   |   |   |   |                          |   |   |   |   |   |   |   |   |   |                            |   |   |   |   |   |   |   |   |   |                        |   |   |   |   |   |   |   |   |   |                             |   |   |   |   |   |   |   |   |   |
| <i>a Trifolium pratense</i>                                                                                                                                                                                                                                                                                                                                                                                                                                                                                                                                                                                                                                                                                                                                                                                                                                                                                                                                                                                                                                                                                                                                                                                                                                                                                                                                                                                                                                                                                                                                                                                                                                                                                                                                                                                                                                                                                                                                                                                                                                                                                                                                                                                                                                                                                 | +        | .        | .        | +        | .        | .        | .        | .        | .        |                         |   |   |   |   |   |   |   |   |   |                             |   |   |   |   |   |   |   |   |   |                          |   |   |   |   |   |   |   |   |   |                               |   |   |   |   |   |   |   |   |   |                          |   |   |   |   |   |   |   |   |   |                            |   |   |   |   |   |   |   |   |   |                        |   |   |   |   |   |   |   |   |   |                              |   |   |   |   |   |   |   |   |   |                                |   |   |   |   |   |   |   |   |   |                           |   |   |   |   |   |   |   |   |   |                          |   |   |   |   |   |   |   |   |   |                            |   |   |   |   |   |   |   |   |   |                        |   |   |   |   |   |   |   |   |   |                             |   |   |   |   |   |   |   |   |   |

|                                                                                      |   |   |   |   |   |   |   |   |   |
|--------------------------------------------------------------------------------------|---|---|---|---|---|---|---|---|---|
| <i>b Lolium perenne</i>                                                              | + | . | . | + | . | . | . | . | . |
| <i>c Achillea millefolium</i>                                                        | + | + | + | . | + | . | + | . | + |
| <i>d Arrhenatherum elatius</i>                                                       | . | + | + | . | . | . | . | + | . |
| <i>d Galium mollugo</i>                                                              | . | . | + | + | . | . | . | . | . |
| III. Ch: a - <i>Artemisietalia vulgaris</i>                                          |   |   |   |   |   |   |   |   |   |
| <i>Artemisia vulgaris</i>                                                            | + | . | + | + | . | . | . | + | . |
| <i>Urtica dioica</i>                                                                 | . | + | . | . | . | . | . | . | . |
| <i>Cirsium arvense</i>                                                               | . | . | + | . | . | . | . | . | . |
| IV. Ch: <i>Agropyreteea intermedio-repentis</i>                                      |   |   |   |   |   |   |   |   |   |
| <i>Convolvulus arvensis</i>                                                          | . | . | + | . | + | . | . | . | . |
| V. Ch: <i>Koelerio glaucae-Coryneporetea canescentis</i>                             |   |   |   |   |   |   |   |   |   |
| <i>Trifolium arvense</i>                                                             | + | . | . | . | + | . | + | . | . |
| VI. Other:                                                                           |   |   |   |   |   |   |   |   |   |
| <i>Setaria pumila</i>                                                                | . | . | . | + | . | . | . | . | . |
| <i>Malva neglecta</i>                                                                | . | + | . | . | . | . | . | . | . |
| Occasional species: VI- <i>Polygonum persicaria</i> +/2; <i>Lamium purpureum</i> +/4 |   |   |   |   |   |   |   |   |   |

## 6 - *Urtico-Malvetum neglectae*

| Community number                | 6        |          |          |          |          |          |
|---------------------------------|----------|----------|----------|----------|----------|----------|
| Relevé number in table          | 1        | 2        | 3        | 4        | 5        | 6        |
| Relevé number                   | 5        | 38       | 56       | 64       | 70       | 93       |
| Cover tree and shrubs layer [%] | -        | -        | -        | -        | -        | -        |
| Cover layer herb layer [%]      | 80       | 95       | 100      | 100      | 90       | 100      |
| Area [m2]                       | 10       | 10       | 10       | 10       | 10       | 10       |
| Date                            | 11.08.19 | 21.06.20 | 28.06.20 | 28.06.20 | 08.08.20 | 30.08.20 |



| Number of species                                                                                                                                                                                           | 8 | 7 | 10 | 7 | 10 | 5 |
|-------------------------------------------------------------------------------------------------------------------------------------------------------------------------------------------------------------|---|---|----|---|----|---|
| I. Ch: <i>a-Stellarietea mediae</i> ; <i>b- Sisymbrietalia</i> ; <i>c-Polygono-Chenopodietalia</i> ; <i>d -Polygono-Chenopodion</i> ; <i>e - Centauretalia cyanii</i> , <i>f- Urtico-Malvetum neglectae</i> |   |   |    |   |    |   |
| <i>a Viola arvensis</i>                                                                                                                                                                                     | . | . | .  | . | .  | + |
| <i>a Anagallis arvensis</i>                                                                                                                                                                                 | . | + | +  | . | .  | . |
| <i>b Sisymbrium officinale</i>                                                                                                                                                                              | . | . | +  | . | .  | . |
| <i>c Sonchus arvensis</i>                                                                                                                                                                                   | . | + | .  | . | .  | . |
| <i>c Stellaria media</i>                                                                                                                                                                                    | + | . | .  | . | +  | . |
| <i>d Sonchus oleraceus</i>                                                                                                                                                                                  | . | . | .  | + | +  | . |
| <i>e Anthemis arvensis</i>                                                                                                                                                                                  | . | . | +  | . | .  | . |
| <i>f Malva neglecta</i>                                                                                                                                                                                     | 3 | 3 | 2  | 3 | 3  | 4 |
| <i>f Malva pusilla</i>                                                                                                                                                                                      | . | + | +  | . | +  | . |
| <i>f Urtica urens</i>                                                                                                                                                                                       | 1 | 2 | 2  | 1 | +  | + |
| II.Ch: <i>a-Molinio-Arrhenatheretea</i> ; <i>b-Polygonion avicularis</i> ; <i>c-Arrhenatheretalia</i> ; <i>d- Arrhenatherion elatioris</i>                                                                  |   |   |    |   |    |   |
| <i>a Festuca pratensis</i>                                                                                                                                                                                  | + | . | .  | . | +  | . |
| <i>b Lolium perenne</i>                                                                                                                                                                                     | . | . | .  | . | +  | . |
| <i>c Achillea millefolium</i>                                                                                                                                                                               | . | . | .  | + | .  | + |
| <i>b Daucus carota</i>                                                                                                                                                                                      | + | + | .  | . | .  | . |
| <i>b Dactylis glomerata</i>                                                                                                                                                                                 | . | . | +  | . | +  | . |
| <i>d Arrhenatherum elatius</i>                                                                                                                                                                              | . | . | +  | . | .  | . |
| III. Ch: <i>a -Artemisietea vulgaris</i> ; <i>b - Artemisietalia vulgaris</i> ;                                                                                                                             |   |   |    |   |    |   |
| <i>a Malva sylvestris</i>                                                                                                                                                                                   | + | . | +  | + | .  | . |
| <i>b Arctium lappa</i>                                                                                                                                                                                      | . | + | +  | . | .  | . |
| IV. Ch: <i>Agropyretea intermedio-repentis</i>                                                                                                                                                              |   |   |    |   |    |   |
| <i>Equisetum arvense</i>                                                                                                                                                                                    | . | . | +  | . | .  | . |
| V. Ch: <i>Koelerio glaucae-Coryneporetea canescentis</i>                                                                                                                                                    |   |   |    |   |    |   |
| <i>Trifolium arvense</i>                                                                                                                                                                                    | + | . | .  | . | +  | . |
| VI. Other:                                                                                                                                                                                                  |   |   |    |   |    |   |
| <i>Conyza canadensis</i>                                                                                                                                                                                    | + | . | .  | + | +  | + |
| <i>Chenopodium album</i>                                                                                                                                                                                    | . | . | .  | + | .  | . |
| Occasional species: <i>IIa - Trifolium pratense</i> +/3; <i>IIIb - Armoracia rusticana</i> +/2                                                                                                              |   |   |    |   |    |   |

7 - *Calamagrostietum epigeji*

|                                                                                                                                                                                  |          |          |          |          |          |          |
|----------------------------------------------------------------------------------------------------------------------------------------------------------------------------------|----------|----------|----------|----------|----------|----------|
| Community number                                                                                                                                                                 | 7        |          |          |          |          |          |
| Relevé number in table                                                                                                                                                           | 1        | 2        | 3        | 4        | 5        | 6        |
| Relevé number                                                                                                                                                                    | 7        | 17       | 21       | 77       | 80       | 89       |
| Cover tree and shrubs layer [%]                                                                                                                                                  | .        | .        | .        | .        | .        | .        |
| Cover layer herb layer [%]                                                                                                                                                       | 85       | 100      | 100      | 100      | 100      | 100      |
| Area [m2]                                                                                                                                                                        | 20       | 25       | 25       | 10       | 20       | 10       |
| Date                                                                                                                                                                             | 11.08.19 | 25.08.19 | 25.08.19 | 08.08.20 | 30.08.20 | 30.08.20 |
| Number of species                                                                                                                                                                | 10       | 17       | 12       | 14       | 12       | 11       |
| I. Ch: <i>a-Stellarietea mediae</i> ; <i>b-Apera spica-venti</i> ; <i>c-Lamio-Veronicetum politae</i>                                                                            |          |          |          |          |          |          |
| <i>a Vicia hirsuta</i>                                                                                                                                                           | .        | +        | +        | .        | .        | .        |
| <i>b Apera spica-venti</i>                                                                                                                                                       | +        | +        | .        | .        | +        | .        |
| <i>c Veronica agrestis</i>                                                                                                                                                       | .        | +        | .        | .        | .        | .        |
| II.Ch: <i>a-Molinio-Arrhenatheretea</i> ; <i>b -Arrhenatheretalia elatioris</i> ;<br><i>c-Plantaginetalia majoris</i> ; <i>d-Arrhenatherion elatioris</i> ; <i>e -Cynosurion</i> |          |          |          |          |          |          |
| <i>a Poa pratensis</i>                                                                                                                                                           | .        | .        | +        | .        | .        | +        |
| <i>a Festuca rubra</i>                                                                                                                                                           | .        | .        | .        | +        | +        | .        |
| <i>a Vicia cracca</i>                                                                                                                                                            | .        | +        | .        | +        | .        | .        |
| <i>b Achillea millefolium</i>                                                                                                                                                    | +        | +        | .        | +        | .        | +        |
| <i>b Dactylis glomerata</i>                                                                                                                                                      | .        | +        | .        | .        | +        | .        |
| <i>c Lolium perenne</i>                                                                                                                                                          | .        | +        | .        | +        | .        | .        |
| <i>c Plantago major</i>                                                                                                                                                          | +        | .        | +        | +        | .        | +        |
| <i>d Arrhenatherum elatius</i>                                                                                                                                                   | .        | +        | .        | .        | +        | .        |
| <i>d Geranium pratense</i>                                                                                                                                                       | +        | +        | .        | +        | .        | +        |
| <i>d Pastinaca sativa</i>                                                                                                                                                        | +        | .        | .        | +        | .        | .        |
| <i>e Leontodon autumnalis</i>                                                                                                                                                    | .        | .        | +        | .        | .        | .        |

|                                                                                                                                                                                                                             |   |   |   |   |   |   |
|-----------------------------------------------------------------------------------------------------------------------------------------------------------------------------------------------------------------------------|---|---|---|---|---|---|
| III. Ch: <i>a -Artemisietea vulgaris</i> ; <i>b - Artemisietalia vulgaris</i> ; <i>c - Onopordetalia acanthii</i> ; <i>d-Rudbeckio-Solidaginetium</i>                                                                       |   |   |   |   |   |   |
| <i>a Armoracia rusticana</i>                                                                                                                                                                                                | + | + | . | . | . | . |
| <i>a Artemisia vulgaris</i>                                                                                                                                                                                                 | + | . | + | + | + | + |
| <i>a Geranium robertianum</i>                                                                                                                                                                                               | . | + | + | + | . | + |
| <i>a Linaria vulgaris</i>                                                                                                                                                                                                   | + | . | . | + | . | . |
| <i>a Urtica dioica</i>                                                                                                                                                                                                      | . | . | + | . | . | + |
| <i>b Taraxacum officinale</i>                                                                                                                                                                                               | . | . | . | . | + | + |
| <i>c Oenothera biennis</i>                                                                                                                                                                                                  | . | . | . | . | + | . |
| <i>d Solidago gigantea</i>                                                                                                                                                                                                  | . | + | + | . | + | . |
| IV.Ch: <i>Agropyretea intermedio-repentis</i>                                                                                                                                                                               |   |   |   |   |   |   |
| <i>Equisetum arvense</i>                                                                                                                                                                                                    | . | + | + | . | . | . |
| <i>Convolvulus arvensis</i>                                                                                                                                                                                                 | . | + | . | . | + | . |
| V. Ch: <i>Koelerio glaucae-Corynephoretea canescentis</i>                                                                                                                                                                   |   |   |   |   |   |   |
| <i>Rumex acetosella</i>                                                                                                                                                                                                     | . | . | + | . | . | + |
| VI.Ch: <i>a - Epilobietea angustifolii</i> ; <i>b- Epilobion angustifolii</i>                                                                                                                                               |   |   |   |   |   |   |
| <i>a Calamagrostis epigejos</i>                                                                                                                                                                                             | 4 | 5 | 4 | 4 | 5 | 5 |
| <i>b Chamaenerion angustifolium</i>                                                                                                                                                                                         | + | . | . | + | + | . |
| VII. Other:                                                                                                                                                                                                                 |   |   |   |   |   |   |
| <i>Conyza canadensis</i>                                                                                                                                                                                                    | . | + | + | + | + | + |
| <i>Medicago sativa</i>                                                                                                                                                                                                      | . | + | . | + | . | . |
| Occasional species: <i>VI-Amaranthus retroflexus</i> +/2; <i>Plantago major</i> +/3;<br><i>Vla-Rubus idaeus</i> +/6; <i>IIIa-Fallopia convolvulus</i> +/5; <i>Ia-Crepis tectorum</i> +/5;<br><i>Ie-Bellis perennis</i> +/1; |   |   |   |   |   |   |

8 - *Sambucetum nigrae*; 9 - *Artemisio-Tanacetetum vulgaris*

| Community number                                                                                                                                           | 8        |          |          | 9        |          |          |          |          |          |          |
|------------------------------------------------------------------------------------------------------------------------------------------------------------|----------|----------|----------|----------|----------|----------|----------|----------|----------|----------|
| Relevé number in table                                                                                                                                     | 1        | 2        | 3        | 4        | 5        | 6        | 7        | 8        | 9        | 10       |
| Relevé number                                                                                                                                              | 41       | 104      | 105      | 15       | 27       | 39       | 43       | 47       | 55       | 87       |
| Pokrycie warstwy drzew i krzewów w %                                                                                                                       | 80       | 100      | 100      | -        | -        | -        | -        | -        | -        | -        |
| Cover layer herb layer [%]                                                                                                                                 | 10       | 10       | 10       | 100      | 100      | 100      | 100      | 100      | 100      | 100      |
| Area [m2]                                                                                                                                                  | 20       | 30       | 30       | 20       | 15       | 15       | 25       | 16       | 20       | 10       |
| Date                                                                                                                                                       | 21.06.20 | 18.04.21 | 18.04.21 | 25.08.19 | 25.08.19 | 21.06.20 | 21.06.20 | 21.06.20 | 28.06.20 | 30.08.20 |
| Number of species                                                                                                                                          | 5        | 8        | 8        | 10       | 13       | 10       | 12       | 12       | 11       | 13       |
| I. Ch: <i>Sambuco-Salicion</i>                                                                                                                             |          |          |          |          |          |          |          |          |          |          |
| <i>Salix caprea</i>                                                                                                                                        | 1        | 1        | +        | .        | .        | .        | .        | .        | .        | .        |
| <i>Sambucus nigra</i>                                                                                                                                      | 4        | 4        | 5        | .        | .        | .        | .        | .        | .        | .        |
| II. Ch: <i>a-Stellarietea mediae</i> ; <i>b-Apera spica-venti</i> ; <i>c-Sisymbrietum loeselii</i> ; <i>d-Polygono-Chenopodietalia</i>                     |          |          |          |          |          |          |          |          |          |          |
| <i>a Veronica arvensis</i>                                                                                                                                 | .        | .        | .        | .        | .        | .        | +        | +        | .        | +        |
| <i>b Apera spica-venti</i>                                                                                                                                 | .        | +        | +        | .        | +        | .        | .        | .        | +        | +        |
| <i>d Sonchus oleraceus</i>                                                                                                                                 | .        | .        | .        | +        | .        | +        | +        | .        | .        | +        |
| <i>a Viola arvensis</i>                                                                                                                                    | .        | .        | .        | .        | +        | .        | .        | .        | +        | .        |
| <i>c Sisymbrium loeselii</i>                                                                                                                               | .        | .        | .        | .        | +        | .        | .        | +        | .        | .        |
| III.Ch: <i>a-Molinio-Arrhenatheretea</i> ; <i>b -Arrhenatheretalia elatioris</i> ; <i>c-Plantaginietalia majoris</i> ; <i>d-Arrhenatherion elatioris</i> ; |          |          |          |          |          |          |          |          |          |          |
| <i>a Vicia cracca</i>                                                                                                                                      | +        | .        | .        | +        | +        | .        | +        | .        | +        | +        |
| <i>b Achillea millefolium</i>                                                                                                                              | .        | +        | .        | +        | +        | .        | .        | +        | .        | .        |

|                                                                                                                                                                                                                                                                                     |              |                      |
|-------------------------------------------------------------------------------------------------------------------------------------------------------------------------------------------------------------------------------------------------------------------------------------|--------------|----------------------|
| <i>b Dactylis glomerata</i>                                                                                                                                                                                                                                                         | . + .        | . . + . . + +        |
| <i>c Plantago major</i>                                                                                                                                                                                                                                                             | . . .        | <i>r</i> . + . . . . |
| <i>d Daucus carota</i>                                                                                                                                                                                                                                                              | . . .        | + + . . . . +        |
| <i>d Galium mollugo</i>                                                                                                                                                                                                                                                             | . . .        | + + . . + + .        |
| <i>d Pastinaca sativa</i>                                                                                                                                                                                                                                                           | . . .        | + + . . . . .        |
| IV. Ch: <i>a -Artemisietea vulgaris</i> ; <i>b - Artemisietalia vulgaris</i> ; <i>c - Onopordetalia acanthii</i> ; <i>d-Artemisio-Tanacetetum vulgaris</i>                                                                                                                          |              |                      |
| <i>a Armoracia rusticana</i>                                                                                                                                                                                                                                                        | . . .        | . . + . . . .        |
| <i>a Artemisia vulgaris</i>                                                                                                                                                                                                                                                         | + . +        | 2 1 2 4 3 + 2        |
| <i>a Geranium robertianum</i>                                                                                                                                                                                                                                                       | . + +        | . . . .+ . . .       |
| <i>a Linaria vulgaris</i>                                                                                                                                                                                                                                                           | . . .        | . + . . + . .        |
| <i>a Urtica dioica</i>                                                                                                                                                                                                                                                              | . + +        | . . . + + + .        |
| <i>b Arctium lappa</i>                                                                                                                                                                                                                                                              | . . .        | . . . . + . +        |
| <i>c Oenothera biennis</i>                                                                                                                                                                                                                                                          | . . .        | . . + + . . +        |
| <i>d Tanacetum vulgare</i>                                                                                                                                                                                                                                                          | . . .        | + 1 + 1 1 2 1        |
| V.Ch: <i>Agropyretea intermedio-repentis</i>                                                                                                                                                                                                                                        |              |                      |
| <i>Equisetum arvense</i>                                                                                                                                                                                                                                                            | . . +        | . . . + + . +        |
| <i>Poa angustifolia</i>                                                                                                                                                                                                                                                             | . . .        | . . + . . + .        |
| <i>Convolvulus arvensis</i>                                                                                                                                                                                                                                                         | . . .        | + + . . . . +        |
| VI. Ch: <i>Koelerio glaucae-Coryneporetea canescentis</i>                                                                                                                                                                                                                           |              |                      |
| <i>Rumex acetosella</i>                                                                                                                                                                                                                                                             | . . .        | . + + + . . .        |
| VII.Ch: <i>Epilobietea angustifolii</i>                                                                                                                                                                                                                                             |              |                      |
| <i>Calamagrostis epigejos</i>                                                                                                                                                                                                                                                       | + . .        | . + .+ . + + .       |
| VIII. Ch: <i>Quercu-Fagetea</i>                                                                                                                                                                                                                                                     |              |                      |
| <i>Aegopodium podagraria</i>                                                                                                                                                                                                                                                        | . . +        | . . . . . . .        |
| IX. Other:                                                                                                                                                                                                                                                                          |              |                      |
| <i>Conyza canadensis</i>                                                                                                                                                                                                                                                            | . <i>r</i> . | . . . + + + .        |
| <i>Amaranthus retroflexus</i>                                                                                                                                                                                                                                                       | . . .        | . . . + . . +        |
| Occasional species: <i>I Ib -Vicia hirsuta</i> +/5; <i>IV a - Lamium album</i> <i>r</i> /8, <i>IV c - Reseda lutea</i> +/ 8, <i>VIII - Corylus avellana</i> +/1; <i>IX- Carpinus betulus</i> +/2, <i>Anthriscus sylvestris</i> <i>r</i> /7, <i>Symphoricarpos albus</i> <i>r</i> /1 |              |                      |

10 - *Arctio-Artemisietum vulgaris*

|                                                                                                                                                                                    |          |          |          |          |          |
|------------------------------------------------------------------------------------------------------------------------------------------------------------------------------------|----------|----------|----------|----------|----------|
| Community number                                                                                                                                                                   | 10       |          |          |          |          |
| Relevé number in table                                                                                                                                                             | 1        | 2        | 3        | 4        | 5        |
| Relevé number                                                                                                                                                                      | 30       | 37       | 49       | 65       | 79       |
| Cover tree and shrubs layer [%]                                                                                                                                                    | -        | -        | -        | -        | -        |
| Cover layer herb layer [%]                                                                                                                                                         | 90       | 90       | 100      | 100      | 70       |
| Area [m2]                                                                                                                                                                          | 15       | 20       | 10       | 20       | 15       |
| Date                                                                                                                                                                               | 25.08.19 | 21.06.20 | 21.06.20 | 28.06.20 | 08.08.20 |
| Number of species                                                                                                                                                                  | 5        | 7        | 10       | 9        | 10       |
| I. Ch: <i>Sisymbrietum loeselii</i>                                                                                                                                                |          |          |          |          |          |
| <i>Sisymbrium loeselii</i>                                                                                                                                                         | +        | +        | .        | .        | .        |
| II.Ch: <i>a-Molinio-Arrhenatheretea; b -Arrhenatheretalia elatioris; c-Trifolio fragiferae-Agrostietalia stoloniferae; d-Arrhenatherion elatioris; e- Plantaginietalia majoris</i> |          |          |          |          |          |
| <i>a Lathyrus pratensis</i>                                                                                                                                                        | .        | .        | +        | .        | .        |
| <i>b Achillea millefolium</i>                                                                                                                                                      | .        | .        | .        | +        | +        |
| <i>b Dactylis glomerata</i>                                                                                                                                                        | .        | +        | +        | .        | +        |
| <i>c Rumex crispus</i>                                                                                                                                                             | .        | .        | +        | .        | +        |
| <i>d Daucus carota</i>                                                                                                                                                             | +        | .        | .        | .        | +        |
| <i>e Lolium perenne</i>                                                                                                                                                            | .        | .        | .        | +        | .        |
| III. Ch: <i>a -Artemisietea vulgaris; b - Artemisietalia vulgaris; c-Artemisio-Tanacetetum vulgaris; d- Dauco-Melilotenion</i>                                                     |          |          |          |          |          |
| <i>a Artemisia vulgaris</i>                                                                                                                                                        | 1        | 4        | 2        | 1        | 3        |
| <i>a Geranium robertianum</i>                                                                                                                                                      | .        | .        | +        | +        | .        |
| <i>a Urtica dioica</i>                                                                                                                                                             | .        | +        | +        | .        | +        |
| <i>b Arctium lappa</i>                                                                                                                                                             | 2        | +        | 3        | 3        | +        |

|                                                                                                      |   |   |   |   |   |
|------------------------------------------------------------------------------------------------------|---|---|---|---|---|
| <i>c Tanacetum vulgare</i>                                                                           | . | . | . | + | . |
| <i>d Berteroa incana</i>                                                                             | . | . | + | . | . |
| IV.Ch: <i>Agropyretea intermedio-repentis</i>                                                        |   |   |   |   |   |
| <i>Elymus repens</i>                                                                                 | + | + | . | + | . |
| <i>Poa angustifolia</i>                                                                              | . | . | + | + | + |
| <i>Convolvulus arvensis</i>                                                                          | . | + | . | . | + |
| V.Ch: <i>Epilobietea angustifolii</i>                                                                |   |   |   |   |   |
| <i>Calamagrostis epigejos</i>                                                                        | . | . | + | + | . |
| VI. Other:                                                                                           |   |   |   |   |   |
| <i>Conyza canadensis</i>                                                                             | . | . | . | . | + |
| Occasional species: <i>Ila</i> - <i>Trifolium pratense</i> +/3; <i>Ila</i> - <i>Vicia cracca</i> +/4 |   |   |   |   |   |

11 - *Rudbeckio-Solidaginetum*; 12 - *Convolvulo arvensis-Agropyretum repentis*

| Community number                                                                                                                                                                                    | 11       |          |          |          |          | 12       |          |
|-----------------------------------------------------------------------------------------------------------------------------------------------------------------------------------------------------|----------|----------|----------|----------|----------|----------|----------|
| Relevé number in table                                                                                                                                                                              | 1        | 2        | 3        | 4        | 5        | 6        | 7        |
| Relevé number                                                                                                                                                                                       | 19       | 23       | 25       | 91       | 101      | 36       | 97       |
| Cover tree and shrubs layer [%]                                                                                                                                                                     | -        | -        | -        | -        | -        | -        | -        |
| Cover layer herb layer [%]                                                                                                                                                                          | 100      | 90       | 100      | 100      | 100      | 100      | 100      |
| Area [m2]                                                                                                                                                                                           | 10       | 15       | 10       | 20       | 10       | 10       | 20       |
| Date                                                                                                                                                                                                | 25.08.19 | 25.08.19 | 25.08.19 | 30.08.20 | 18.04.21 | 21.06.20 | 18.04.21 |
| Number of species                                                                                                                                                                                   | 6        | 11       | 8        | 14       | 8        | 11       | 14       |
| I. Ch: <i>a-Stellarietea mediae</i> (x) <i>b-Apera spica-venti</i> ; <i>c -Polygono-Chenopodion</i>                                                                                                 |          |          |          |          |          |          |          |
| <i>b Apera spica-venti</i>                                                                                                                                                                          | .        | .        | .        | +        | +        | .        | +        |
| <i>c Lamium purpureum</i>                                                                                                                                                                           | .        | +        | .        | .        | .        | .        | +        |
| <i>c Sonchus oleraceus</i>                                                                                                                                                                          | .        | .        | +        | +        | .        | +        | +        |
| II.Ch: <i>a-Molinio-Arrhenatheretea</i> ; <i>b -Arrhenatheretalia elatioris</i> ; <i>c-Trifolio fragiferae-Agrostietalia</i> ; <i>d-Arrhenatherion elatioris</i> ; <i>e Plantaginetalia majoris</i> |          |          |          |          |          |          |          |
| <i>a Lathyrus pratensis</i>                                                                                                                                                                         | .        | .        | +        | .        | +        | .        | .        |
| <i>b Achillea millefolium</i>                                                                                                                                                                       | +        | +        | .        | .        | .        | .        | +        |
| <i>b Dactylis glomerata</i>                                                                                                                                                                         | .        | .        | .        | +        | .        | +        | .        |
| <i>c Rumex crispus</i>                                                                                                                                                                              | .        | .        | .        | .        | .        | .        | +        |
| <i>a Poa pratensis</i>                                                                                                                                                                              | .        | .        | +        | +        | +        | .        | +        |
| <i>d Galium mollugo</i>                                                                                                                                                                             | .        | .        | +        | +        | .        | .        | .        |
| III. Ch: <i>a -Artemisietea vulgaris</i> ; <i>b- Convolvuletalia sepium</i> ; <i>c-Dauco-Melilotenion</i> ; <i>d-Senecion fluviatilis</i>                                                           |          |          |          |          |          |          |          |
| <i>a Cirsium arvense</i>                                                                                                                                                                            | .        | +        | .        | .        | .        | +        | .        |
| <i>a Artemisia vulgaris</i>                                                                                                                                                                         | .        | .        | .        | .        | .        | +        | +        |



|                                                                                                                                                                                           |   |   |   |   |   |   |   |
|-------------------------------------------------------------------------------------------------------------------------------------------------------------------------------------------|---|---|---|---|---|---|---|
| <i>a Linaria vulgaris</i>                                                                                                                                                                 | . | + | . | . | + | . | . |
| <i>a Urtica dioica</i>                                                                                                                                                                    | + | . | . | + | . | + | . |
| <i>b Calystegia sepium</i>                                                                                                                                                                | . | . | . | + | . | . | . |
| <i>d Solidago canadensis</i>                                                                                                                                                              | 4 | 3 | 2 | 3 | 2 | . | + |
| <i>d Solidago gigantea</i>                                                                                                                                                                | 4 | 3 | 4 | 4 | 4 | . | . |
| <i>c Berteroa incana</i>                                                                                                                                                                  | . | + | . | + | . | + | + |
| <i>c Tanacetum vulgare</i>                                                                                                                                                                | . | + | . | + | . | . | . |
| IV.Ch: <i>Agropyreteea intermedio-repentis</i>                                                                                                                                            |   |   |   |   |   |   |   |
| <i>Elymus repens</i>                                                                                                                                                                      | . | + | . | . | . | 5 | 4 |
| <i>Poa angustifolia</i>                                                                                                                                                                   | + | . | + | . | . | . | + |
| <i>Bromus inermis</i>                                                                                                                                                                     | + | . | . | + | . | . | . |
| <i>Convolvulus arvensis</i>                                                                                                                                                               | . | . | . | + | + | 2 | 2 |
| V.Ch: <i>Epilobietea angustifolii</i>                                                                                                                                                     |   |   |   |   |   |   |   |
| <i>Calamagrostis epigejos</i>                                                                                                                                                             | . | + | . | + | + | + | + |
| VI. Other:                                                                                                                                                                                |   |   |   |   |   |   |   |
| <i>Agrostis capillaris</i>                                                                                                                                                                | . | . | . | . | . | + | + |
| <i>Conyza canadensis</i>                                                                                                                                                                  | . | + | + | . | . | + | . |
| Occasional species: Ia - <i>Fallopia convolvulus</i> +/-6; III a- <i>Daucus carota</i> +/-7; VI - <i>Sambucus nigra</i> +/-3; VI- <i>Betula pendula</i> +/-4, <i>Erigeron annuus</i> +/-7 |   |   |   |   |   |   |   |

13 - *Phragmitetum australis*, 14 - *Typhetum latifoliae*

| Community number                | 13 |     |    |     | 14  |     |     |
|---------------------------------|----|-----|----|-----|-----|-----|-----|
| Relevé number in table          | 1  | 2   | 3  | 4   | 6   | 7   | 8   |
| Relevé number                   | 16 | 22  | 84 | 99  | 11  | 24  | 83  |
| Cover tree and shrubs layer [%] | -  | 1   | -  | 1   | -   | -   | -   |
| Cover layer herb layer [%]      | 95 | 100 | 90 | 100 | 100 | 100 | 100 |
| Area [m2]                       | 10 | 20  | 25 | 15  | 10  | 20  | 20  |

| Date                                                                      | 25.08.19 | 25.08.19 | 30.08.20 | 18.04.21 | 25.08.19 | 25.08.19 | 30.08.20 |
|---------------------------------------------------------------------------|----------|----------|----------|----------|----------|----------|----------|
| Number of species                                                         | 8        | 10       | 7        | 6        | 9        | 9        | 7        |
| I. Ch: <i>a-Phragmitetea</i> , <i>b- Magnocaricion</i>                    |          |          |          |          |          |          |          |
| <i>a Phragmites australis</i>                                             | 4        | 5        | 5        | 5        | 1        | 2        | +        |
| <i>a Acorus calamus</i>                                                   | +        | .        | 1        | .        | 1        | 2        | 2        |
| <i>a Glyceria maxima</i>                                                  | 1        | +        | 2        | +        | 1        | +        | 1        |
| <i>a Rumex hydrolapathum</i>                                              | +        | +        | .        | .        | +        | .        | .        |
| <i>a Typha latifolia</i>                                                  | 1        | +        | .        | .        | 4        | 5        | 4        |
| <i>b Carex acutiformis</i>                                                | 1        | +        | 2        | .        | +        | +        | 2        |
| <i>b Phalaris arundinacea</i>                                             | .        | .        | +        | +        | .        | +        | +        |
| <i>b Poa palustris</i>                                                    | 1        | +        | 1        | .        | +        | 1        | 1        |
| <i>b Rumex crispus</i>                                                    | +        | .        | +        | .        | .        | +        | .        |
| II.Ch: <i>Filipendulion ulmariae</i>                                      |          |          |          |          |          |          |          |
| <i>Filipendula ulmaria</i>                                                | +        | .        | .        | .        | +        | .        | .        |
| III.Ch: <i>Epilobietea angustifolii</i>                                   |          |          |          |          |          |          |          |
| <i>Salix caprea</i>                                                       | .        | +        | .        | +        | .        | .        | .        |
| IV. Ch: <i>a - Artemisietea vulgaris</i> ; <i>b - Convolvulion sepium</i> |          |          |          |          |          |          |          |
| <i>a Urtica dioica</i>                                                    | .        | +        | .        | .        | .        | .        | .        |
| <i>b Eupatorium cannabinum</i>                                            | .        | .        | .        | .        | +        | +        | .        |
| V. Other:                                                                 |          |          |          |          |          |          |          |
| <i>Solidago canadensis</i>                                                | .        | +        | .        | +        | .        | .        | .        |
| <i>Calamagrostis canescens</i>                                            | .        | +        | .        | +        | .        | .        | .        |
| Occasional species: V- <i>Tussilago farfara</i> +/-4                      |          |          |          |          |          |          |          |

15 - *Glycerietum maximae*

|                                                                            |          |          |          |          |          |          |
|----------------------------------------------------------------------------|----------|----------|----------|----------|----------|----------|
| Community number                                                           | 15       |          |          |          |          |          |
| Relevé number in table                                                     | 1        | 2        | 3        | 4        | 5        | 6        |
| Relevé number                                                              | 45       | 51       | 57       | 66       | 67       | 68       |
| Cover tree and shrubs layer [%]                                            | -        | -        | -        | -        | -        | -        |
| Cover layer herb layer [%]                                                 | 95       | 100      | 90       | 100      | 90       | 100      |
| Area [m2]                                                                  | 40       | 35       | 25       | 25       | 30       | 30       |
| Date                                                                       | 21.06.20 | 21.06.20 | 28.06.20 | 11.07.20 | 11.07.20 | 11.07.20 |
| Number of species                                                          | 10       | 8        | 9        | 8        | 7        | 12       |
| I. Ch: <i>a-Phragmitetea</i> , <i>b- Magnocaricion</i>                     |          |          |          |          |          |          |
| <i>a Acorus calamus</i>                                                    | 1        | 2        | .        | 1        | +        | .        |
| <i>a Glyceria maxima</i>                                                   | 5        | 4        | 5        | 5        | 4        | 4        |
| <i>a Phragmites australis</i>                                              | 1        | +        | 1        | 1        | +        | 2        |
| <i>a Rumex hydrolapathum</i>                                               | .        | +        | .        | +        | +        | +        |
| <i>a Typha latifolia</i>                                                   | .        | +        | .        | .        | .        | +        |
| <i>b Carex acutiformis</i>                                                 | 1        | +        | +        | 1        | +        | .        |
| <i>b Phalaris arundinacea</i>                                              | +        | .        | .        | .        | +        | +        |
| <i>b Poa palustris</i>                                                     | +        | +        | +        | .        | .        | 1        |
| <i>b Galium palustre</i>                                                   | .        | .        | .        | .        | +        | +        |
| <i>b Rumex crispus</i>                                                     | +        | .        | +        | +        | .        | +        |
| II. Ch: <i>a-Molinio-Arrhenatheretea</i> ; <i>b-Filipendulion ulmariae</i> |          |          |          |          |          |          |
| <i>a Alopecurus pratensis</i>                                              | .        | .        | +        | +        | .        | +        |
| <i>b Geranium palustre</i>                                                 | .        | .        | +        | .        | .        | +        |
| <i>b Valeriana officinalis</i>                                             | .        | .        | +        | .        | .        | .        |
| <i>a Poa pratensis</i>                                                     | +        | +        | +        | .        | .        | +        |

|                                                                                            |   |   |   |   |   |   |
|--------------------------------------------------------------------------------------------|---|---|---|---|---|---|
| III.Ch: <i>Artemisietea vulgaris</i>                                                       |   |   |   |   |   |   |
| <i>Urtica dioica</i>                                                                       | + | . | . | + | . | . |
| IV. Other:                                                                                 |   |   |   |   |   |   |
| <i>Ranunculus repens</i>                                                                   | + | . | . | . | . | + |
| Occasional species: <i>Ila: Angelica sylvestris</i> +/1 <i>IV: Filipendula ulmaria</i> +/3 |   |   |   |   |   |   |

### 16 - *Lolio-Polygonetum arenastri*

|                                                                                                                                                |          |          |          |          |          |
|------------------------------------------------------------------------------------------------------------------------------------------------|----------|----------|----------|----------|----------|
| Community number                                                                                                                               | 16       |          |          |          |          |
| Relevé number in table                                                                                                                         | 1        | 2        | 3        | 4        | 5        |
| Relevé number                                                                                                                                  | 10       | 26       | 88       | 98       | 106      |
| Cover tree and shrubs layer [%]                                                                                                                | .        | .        | .        | .        | .        |
| Cover layer herb layer [%]                                                                                                                     | 100      | 100      | 100      | 100      | 100      |
| Area [m2]                                                                                                                                      | 10       | 20       | 10       | 10       | 15       |
| Date                                                                                                                                           | 25.08.19 | 25.08.19 | 30.08.20 | 18.04.21 | 18.04.21 |
| Number of species                                                                                                                              | 10       | 5        | 7        | 11       | 7        |
| I. Ch: <i>Ch: a-Stellarietetea mediae; b-Aperion spicae-venti; c-Polygono-Chenopodietalia; d - Panico-Setarion</i>                             |          |          |          |          |          |
| <i>a Polygonum aviculare</i>                                                                                                                   | 1        | +        | +        | +        | 1        |
| <i>b Apera spica-venti</i>                                                                                                                     | +        | .        | .        | +        | .        |
| <i>c Echinochloa crus-galli</i>                                                                                                                | .        | .        | .        | +        | +        |
| <i>d Setaria pumila</i>                                                                                                                        | .        | +        | .        | .        | +        |
| II.Ch: <i>a-Molinio-Arrhenatheretea; b -Arrhenatheretalia elatioris; c-Plantaginietalia majoris; d-Arrhenatherion elatioris; e -Cynosurion</i> |          |          |          |          |          |

|                                                                                          |   |   |   |   |   |
|------------------------------------------------------------------------------------------|---|---|---|---|---|
| <i>a Poa pratensis</i>                                                                   | . | + | . | + | . |
| <i>a Trifolium pratense</i>                                                              | + | . | + | + | + |
| <i>b Achillea millefolium</i>                                                            | + | . | . | + | . |
| <i>b Dactylis glomerata</i>                                                              | . | . | + | + | . |
| <i>c Chamomilla suaveolens</i>                                                           | + | . | . | . | + |
| <i>c Lolium perenne</i>                                                                  | 2 | 3 | 3 | 4 | 2 |
| <i>c Plantago major</i>                                                                  | 1 | + | + | 1 | 1 |
| <i>d Taraxacum officinale</i>                                                            | + | . | + | . | . |
| <i>e Trifolium repens</i>                                                                | + | . | + | + | . |
| III.Ch: <i>a - Artemisietea vulgaris</i> ; <i>b - Dauco-Melilotenion</i>                 |   |   |   |   |   |
| <i>a Urtica dioica</i>                                                                   | . | . | . | + | . |
| <i>b Tanacetum vulgare</i>                                                               | + | . | . | . | . |
| Occasional species: <i>Ila - Plantago lanceolata</i> +/5; <i>Ilb - Daucus carota</i> +/3 |   |   |   |   |   |

17 - *Filipendulo-Geranium palustris*; 18 - *Molinietum caeruleae*

| Community number                | 17       |          |          | 18       |          |          |          |
|---------------------------------|----------|----------|----------|----------|----------|----------|----------|
| Relevé number in table          | 1        | 2        | 3        | 4        | 5        | 6        | 7        |
| Relevé number                   | 12       | 44       | 103      | 48       | 85       | 86       | 96       |
| Cover tree and shrubs layer [%] | -        | -        | -        | -        | -        | -        | -        |
| Cover layer herb layer [%]      | 100      | 100      | 100      | 100      | 100      | 100      | 100      |
| Area [m2]                       | 20       | 20       | 15       | 25       | 15       | 20       | 20       |
| Date                            | 25.08.19 | 21.06.20 | 18.04.21 | 21.06.20 | 30.08.20 | 30.08.20 | 18.04.21 |
| Number of species               | 9        | 7        | 6        | 12       | 10       | 12       | 14       |

I.Ch: *a-Molinio-Arrhenatheretea*; *b -Molinieta lia caeruleae* , *c- Filipendulion ulmariae*; *d- Molinieta um caeruleae*; *e-Arrhenatheretalia elatioris i Arrhenatherion elatioris*; *f- Trifolio fragiferae-Agrostietalia stoloniferae*

|                                |   |   |   |   |   |   |   |
|--------------------------------|---|---|---|---|---|---|---|
| <i>a Ranunculus acris</i>      | . | . | . | + | . | . | 1 |
| <i>a Centaurea jacea</i>       | . | . | . | 1 | . | + | . |
| <i>a Festuca pratensis</i>     | + | . | . | . | + | . | + |
| <i>a Festuca rubra</i>         | + | . | + | . | . | . | . |
| <i>a Lathyrus pratensis</i>    | . | . | . | . | . | + | . |
| <i>a Plantago lanceolata</i>   | . | + | . | . | + | . | . |
| <i>a Poa pratensis</i>         | + | . | . | . | + | . | + |
| <i>a Rumex acetosella</i>      | . | . | . | + | + | + | . |
| <i>a Trifolium pratense</i>    | + | . | + | + | + | . | + |
| <i>b Angelica sylvestris</i>   | . | + | . | + | . | + | + |
| <i>b Equisetum palustre</i>    | . | + | . | + | . | . | + |
| <i>b Deschampsia cespitosa</i> | . | + | . | 2 | 3 | 2 | 3 |
| <i>c Geranium palustre</i>     | 1 | + | 1 | . | . | . | . |
| <i>c Filipendula ulmaria</i>   | 4 | 4 | 4 | . | + | . | + |
| <i>d Galium boreale</i>        | . | . | . | + | . | + | + |
| <i>d Molinia caerulea</i>      | + | . | . | 2 | 2 | 2 | 1 |
| <i>e Arrhenatherum elatius</i> | . | . | . | . | + | + | + |
| <i>e Dactylis glomerata</i>    | . | . | . | + | . | + | . |
| <i>e Galium mollugo</i>        | . | . | . | + | . | + | + |
| <i>f Ranunculus repens</i>     | . | . | + | . | . | . | + |

II.Ch: *Artemisietea vulgaris*;

|                      |   |   |   |   |   |   |   |
|----------------------|---|---|---|---|---|---|---|
| <i>Urtica dioica</i> | . | . | + | . | . | + | + |
|----------------------|---|---|---|---|---|---|---|

III. Other

|                               |   |   |   |   |   |   |   |
|-------------------------------|---|---|---|---|---|---|---|
| <i>Plantago major</i>         | + | . | . | + | . | + | . |
| <i>Calamagrostis epigeios</i> | + | + | . | . | + | . | . |

Occasional species: *Ia - Vicia cracca* +/2; *Ia - Centaurea cyanus* +/5, *Ib - Juncus effusus* +/5, *Ie- Achillea millefolium* +/6, *Ie - Taraxacum officinale*, *III - Anemone nemorosa* +/5, *Festuca arundinacea* +/5

19 – *Arrhenatheretum elatioris*; 20 - *Poa pratensis*-*Festuca rubra*

| Community number                                                                                                                                                                                                         | 19       |          |          |          | 20       |          |          |
|--------------------------------------------------------------------------------------------------------------------------------------------------------------------------------------------------------------------------|----------|----------|----------|----------|----------|----------|----------|
| Relevé number in table                                                                                                                                                                                                   | 1        | 2        | 3        | 4        | 5        | 6        | 7        |
| Relevé number                                                                                                                                                                                                            | 35       | 53       | 75       | 76       | 2        | 78       | 102      |
| Cover tree and shrubs layer [%]                                                                                                                                                                                          | -        | -        | -        | -        | -        | -        | -        |
| Cover layer herb layer [%]                                                                                                                                                                                               | 100      | 100      | 100      | 100      | 100      | 100      | 100      |
| Area [m2]                                                                                                                                                                                                                | 20       | 30       | 20       | 25       | 25       | 10       | 20       |
| Date                                                                                                                                                                                                                     | 25.08.19 | 28.06.20 | 08.08.20 | 08.08.20 | 11.08.19 | 08.08.20 | 18.04.21 |
| Number of species                                                                                                                                                                                                        | 12       | 13       | 10       | 13       | 13       | 9        | 12       |
| <p>I.Ch: <i>a</i>-<i>Molinio-Arrhenatheretea</i>; <i>b</i>-<i>Arrhenatherion elatioris</i>;<br/> <i>c</i>- <i>Arrhenatheretalia elatioris</i>; <i>d</i>-<i>Plantaginetalia majoris</i>; <i>e</i> - <i>Cynosurion</i></p> |          |          |          |          |          |          |          |
| <i>a Achillea millefolium</i>                                                                                                                                                                                            | +        | +        | 1        | 1        | +        | .        | +        |
| <i>a Bellis perennis</i>                                                                                                                                                                                                 | .        | .        | +        | .        | +        | .        | .        |
| <i>a Festuca pratensis</i>                                                                                                                                                                                               | +        | .        | .        | +        | .        | +        | .        |
| <i>a Festuca rubra</i>                                                                                                                                                                                                   | .        | +        | +        | .        | 4        | 4        | 2        |
| <i>a Heracleum sphondylium</i>                                                                                                                                                                                           | .        | .        | .        | +        | .        | .        | .        |
| <i>a Plantago lanceolata</i>                                                                                                                                                                                             | +        | +        | .        | 1        | +        | .        | .        |
| <i>a Poa pratensis</i>                                                                                                                                                                                                   | +        | +        | 1        | +        | 3        | 2        | 3        |
| <i>a Ranunculus acris</i>                                                                                                                                                                                                | 1        | 1        | +        | 1        | .        | +        | .        |
| <i>a Vicia cracca</i>                                                                                                                                                                                                    | 1        | +        | .        | +        | +        | .        | .        |
| <i>a Trifolium pratense</i>                                                                                                                                                                                              | +        | .        | +        | .        | .        | .        | +        |
| <i>b Arrhenatherum elatius</i>                                                                                                                                                                                           | 2        | 1        | 2        | 3        | .        | +        | +        |
| <i>b Campanula patula</i>                                                                                                                                                                                                | .        | .        | .        | .        | .        | +        | +        |
| <i>b Galium mollugo</i>                                                                                                                                                                                                  | .        | .        | .        | .        | +        | +        | .        |
| <i>b Geranium pratense</i>                                                                                                                                                                                               | +        | .        | .        | +        | .        | +        | .        |

|                                                                                                                                                                                       |   |   |   |   |   |   |   |
|---------------------------------------------------------------------------------------------------------------------------------------------------------------------------------------|---|---|---|---|---|---|---|
| <i>c Dactylis glomerata</i>                                                                                                                                                           | . | + | . | . | + | . | . |
| <i>c Daucus carota</i>                                                                                                                                                                | + | . | + | + | . | . | . |
| <i>c Taraxacum officinale</i>                                                                                                                                                         | 1 | + | + | + | + | . | . |
| <i>d Lolium perenne</i>                                                                                                                                                               | . | + | . | . | + | . | . |
| <i>d Plantago major</i>                                                                                                                                                               | + | + | . | + | . | . | . |
| <i>e Trifolium repens</i>                                                                                                                                                             | . | + | + | . | . | . | + |
| II.Ch: <i>Artemisietea vulgaris</i>                                                                                                                                                   |   |   |   |   |   |   |   |
| <i>Artemisia vulgaris</i>                                                                                                                                                             | . | . | . | + | . | . | + |
| <i>Cirsium arvense</i>                                                                                                                                                                | . | . | . | . | + | . | . |
| <i>Urtica dioica</i>                                                                                                                                                                  | . | . | . | . | + | . | + |
| <i>Tanacetum vulgare</i>                                                                                                                                                              | . | . | . | . | . | . | + |
| III. Other                                                                                                                                                                            |   |   |   |   |   |   |   |
| <i>Agrostis capillaris</i>                                                                                                                                                            | . | . | . | . | . | + | + |
| <i>Galium palustre</i>                                                                                                                                                                | . | . | . | . | + | . | + |
| <i>Rumex acetosella</i>                                                                                                                                                               | . | + | . | . | . | . | . |
| Occasional species: <i>Ia - Alopecurus pratensis</i> +/3; <i>Ib - Pastinaca sativa</i> +/1; <i>II - Leonurus cardiaca</i> +/3, <i>III - Rosa canina</i> +/, <i>Plantago media</i> +/4 |   |   |   |   |   |   |   |

## 21 - *Lolio-Cynosuretum*

|                                 |     |     |     |     |
|---------------------------------|-----|-----|-----|-----|
| Community number                | 21  |     |     |     |
| Relevé number in table          | 1   | 2   | 3   | 4   |
| Relevé number                   | 40  | 69  | 73  | 90  |
| Cover tree and shrubs layer [%] | .   | .   | .   | .   |
| Cover layer herb layer [%]      | 100 | 100 | 100 | 100 |
| Area [m2]                       | 25  | 20  | 20  | 20  |



| Date                                                                                                                                                                                 | 21.06.20 | 11.07.20 | 08.08.20 | 30.08.20 |
|--------------------------------------------------------------------------------------------------------------------------------------------------------------------------------------|----------|----------|----------|----------|
| Number of species                                                                                                                                                                    | 13       | 14       | 12       | 10       |
| <p>I.Ch: <i>a</i> -Molinio-Arrhenatheretea; <i>b</i>- Cynosurion; <i>c</i> - Arrhenatheretalia elatioris; <i>d</i>- Arrhenatherion elatioris; <i>e</i> - Plantaginetalia majoris</p> |          |          |          |          |
| <i>a Achillea millefolium</i>                                                                                                                                                        | .        | +        | .        | +        |
| <i>a Alopecurus pratensis</i>                                                                                                                                                        | +        | .        | .        | .        |
| <i>a Deschampsia cespitosa</i>                                                                                                                                                       | +        | .        | .        | +        |
| <i>a Festuca pratensis</i>                                                                                                                                                           | 1        | 1        | +        | +        |
| <i>a Festuca rubra</i>                                                                                                                                                               | +        | +        | .        | .        |
| <i>a Plantago lanceolata</i>                                                                                                                                                         | +        | .        | +        | .        |
| <i>a Poa pratensis</i>                                                                                                                                                               | +        | .        | .        | +        |
| <i>a Ranunculus acris</i>                                                                                                                                                            | .        | .        | +        | .        |
| <i>a Trifolium pratense</i>                                                                                                                                                          | +        | +        | .        | +        |
| <i>b Bellis perennis</i>                                                                                                                                                             | +        | 1        | .        | +        |
| <i>b Leontodon autumnalis</i>                                                                                                                                                        | .        | +        | +        | .        |
| <i>b Trifolium repens</i>                                                                                                                                                            | 2        | 2        | 1        | 1        |
| <i>c Dactylis glomerata</i>                                                                                                                                                          | .        | +        | +        | +        |
| <i>c Daucus carota</i>                                                                                                                                                               | .        | +        | +        | .        |
| <i>c Taraxacum officinale</i>                                                                                                                                                        | +        | +        | +        | .        |
| <i>d Galium mollugo</i>                                                                                                                                                              | +        | +        | .        | .        |
| <i>e Lolium perenne</i>                                                                                                                                                              | 3        | 2        | 4        | 4        |
| II.Ch: Artemisietea vulgaris;                                                                                                                                                        |          |          |          |          |
| <i>Cirsium arvense</i>                                                                                                                                                               | .        | +        | .        | .        |
| III. Other                                                                                                                                                                           |          |          |          |          |
| <i>Agrostis capillaris</i>                                                                                                                                                           | +        | .        | +        | +        |
| <i>Plantago major</i>                                                                                                                                                                | .        | +        | +        | .        |
| <i>Ranunculus repens</i>                                                                                                                                                             | .        | .        | +        | .        |
| Occasional species: <i>Ia</i> - <i>Vicia cracca</i> +/4; <i>II</i> - <i>Tanacetum vulgare</i> +/4; <i>III</i> - <i>Chamomilla recutita</i> +/2                                       |          |          |          |          |

22 - *Rubus fruticosus*-*Prunetum spinosae*, 23 - *Rubus nigri*-*Alnetum*

| Community number                                                                                          | 22       |          | 23       |          |          |
|-----------------------------------------------------------------------------------------------------------|----------|----------|----------|----------|----------|
| Relevé number in table                                                                                    | 1        | 2        | 3        | 4        | 5        |
| Relevé number                                                                                             | 42       | 100      | 92       | 94       | 95       |
| Cover tree and shrubs layer [%]                                                                           | 100      | 100      | 70       | 75       | 60       |
| Pokrycie warstwy roślin zielnych                                                                          | 10       | 15       | 90       | 90       | 80       |
| Area [m <sup>2</sup> ]                                                                                    | 20       | 35       | 100      | 100      | 100      |
| Date                                                                                                      | 21.06.20 | 18.04.21 | 30.08.20 | 30.08.20 | 30.08.20 |
| Number of species                                                                                         | 12       | 12       | 17       | 16       | 16       |
| I.Ch: <i>a</i> - <i>Rhamno-Prunetea</i> ; <i>b</i> - <i>Pruno-Rubion fruticosi</i>                        |          |          |          |          |          |
| <i>a Crataegus monogyna</i>                                                                               | .        | +        | .        | .        | .        |
| <i>a Rosa canina</i>                                                                                      | 1        | .        | .        | .        | .        |
| <i>a Ulmus minor</i>                                                                                      | +        | +        | .        | +        | .        |
| <i>b Rubus fruticosus</i>                                                                                 | 2        | 3        | +        | 1        | +        |
| <i>b Viburnum opulus</i>                                                                                  | +        | 1        | .        | .        | .        |
| II.Ch: <i>a</i> - <i>Quercus-Fagetea</i> , <i>b</i> - <i>Carpinion betuli</i> , <i>c</i> - <i>Fagalia</i> |          |          |          |          |          |
| <i>a Aegopodium podagraria</i>                                                                            | .        | +        | .        | .        | .        |
| <i>a Anemone nemorosa</i>                                                                                 | .        | .        | .        | +        | +        |
| <i>a Corylus avellana</i>                                                                                 | .        | +        | +        | +        | .        |
| <i>b Stellaria holostea</i>                                                                               | 1        | .        | .        | .        | .        |
| <i>b Carpinus betulus</i>                                                                                 | +        | 1        | .        | .        | .        |
| <i>c Galium odoratum</i>                                                                                  | .        | .        | +        | .        | +        |
| III. Ch: <i>a</i> - <i>Alnetea glutinosae</i> , <i>b</i> - <i>Alnenion glutinoso-incanae</i>              |          |          |          |          |          |
| <i>a Alnus glutinosa</i>                                                                                  | .        | .        | 3        | 3        | 4        |

|                                                                                                                                                                                                                                                                              |   |   |   |   |   |
|------------------------------------------------------------------------------------------------------------------------------------------------------------------------------------------------------------------------------------------------------------------------------|---|---|---|---|---|
| <i>a Calamagrostis canescens</i>                                                                                                                                                                                                                                             | . | . | . | + | . |
| <i>A Solanum dulcamara</i>                                                                                                                                                                                                                                                   | . | . | + | . | + |
| <i>b Caltha palustris</i>                                                                                                                                                                                                                                                    | . | . | . | . | + |
| <i>b Padus avium</i>                                                                                                                                                                                                                                                         | . | . | . | . | + |
| IV.Ch: <i>a - Epilobietea angustifolii</i> , <i>b - Sambuco-Salicion</i>                                                                                                                                                                                                     |   |   |   |   |   |
| <i>a Rubus idaeus</i>                                                                                                                                                                                                                                                        | . | . | + | + | . |
| <i>b Betula pendula</i>                                                                                                                                                                                                                                                      | . | . | 2 | 2 | 2 |
| <i>b Populus tremula</i>                                                                                                                                                                                                                                                     | . | . | 1 | + | + |
| <i>b Sambucus nigra</i>                                                                                                                                                                                                                                                      | . | . | + | . | . |
| V.Ch: <i>a - Molinio-Arrhenatheretea (x)</i> ; <i>b - Molinietalia caeruleae</i> ;<br><i>c - Filipendulion ulmariae</i> ; <i>d - Arrhenatheretalia elatioris</i> ;<br><i>e - Arrhenatherion elatioris</i>                                                                    |   |   |   |   |   |
| <i>b Deschampsia cespitosa</i>                                                                                                                                                                                                                                               | . | . | . | + | . |
| <i>c Filipendula ulmaria</i>                                                                                                                                                                                                                                                 | . | . | + | + | . |
| <i>d Achillea millefolium</i>                                                                                                                                                                                                                                                | + | + | . | . | . |
| <i>d Dactylis glomerata</i>                                                                                                                                                                                                                                                  | + | + | . | . | . |
| <i>e Galium mollugo</i>                                                                                                                                                                                                                                                      | + | + | . | . | . |
| <i>e Geranium pratense</i>                                                                                                                                                                                                                                                   | + | . | + | + | . |
| <i>e Geranium pratense</i>                                                                                                                                                                                                                                                   | + | + | . | . | . |
| VI. Ch: <i>Vaccinio-Piceetea</i>                                                                                                                                                                                                                                             |   |   |   |   |   |
| <i>Picea abies</i>                                                                                                                                                                                                                                                           | . | . | + | . | . |
| <i>Pinus sylvestris</i>                                                                                                                                                                                                                                                      | . | . | + | 1 | 1 |
| VII. Other                                                                                                                                                                                                                                                                   |   |   |   |   |   |
| <i>Betula pubescens</i>                                                                                                                                                                                                                                                      | . | . | + | . | + |
| <i>Equisetum sylvaticum</i>                                                                                                                                                                                                                                                  | . | . | + | + | . |
| <i>Galium palustre</i>                                                                                                                                                                                                                                                       | . | . | . | + | + |
| <i>Poa palustris</i>                                                                                                                                                                                                                                                         | . | . | + | . | + |
| <i>Quercus petraea</i>                                                                                                                                                                                                                                                       | . | . | + | . | + |
| <i>Sorbus aucuparia</i>                                                                                                                                                                                                                                                      | . | . | + | . | + |
| <i>Urtica dioica</i>                                                                                                                                                                                                                                                         | + | + | + | + | + |
| Occasional species: <i>III - Ribes nigrum</i> +/3, <i>IVb - Salix caprea</i> +/3, <i>Va - Vicia cracca</i> +/1; <i>Festuga rubra</i> +/2; <i>VII - Juncus effusus</i> +/4; <i>Salix repens</i> r/4, <i>Prunus domestica</i> ssp. <i>syriaca</i> +/2, <i>Populus alba</i> r/3 |   |   |   |   |   |

24 -*Quercus roboris*-Pinetum

|                                                                                                                                                                                                                                                                                                                                                                                                                                                                                                                                                                                                                                                                                                                                                                                                                                                                                                                                                                     |          |          |          |          |          |          |
|---------------------------------------------------------------------------------------------------------------------------------------------------------------------------------------------------------------------------------------------------------------------------------------------------------------------------------------------------------------------------------------------------------------------------------------------------------------------------------------------------------------------------------------------------------------------------------------------------------------------------------------------------------------------------------------------------------------------------------------------------------------------------------------------------------------------------------------------------------------------------------------------------------------------------------------------------------------------|----------|----------|----------|----------|----------|----------|
| Community number                                                                                                                                                                                                                                                                                                                                                                                                                                                                                                                                                                                                                                                                                                                                                                                                                                                                                                                                                    | 24       |          |          |          |          |          |
| Relevé number in table                                                                                                                                                                                                                                                                                                                                                                                                                                                                                                                                                                                                                                                                                                                                                                                                                                                                                                                                              | 1        | 2        | 3        | 4        | 5        | 6        |
| Relevé number                                                                                                                                                                                                                                                                                                                                                                                                                                                                                                                                                                                                                                                                                                                                                                                                                                                                                                                                                       | 1        | 3        | 33       | 34       | 50       | 52       |
| Cover tree and shrubs layer [%]                                                                                                                                                                                                                                                                                                                                                                                                                                                                                                                                                                                                                                                                                                                                                                                                                                                                                                                                     | 70       | 70       | 70       | 65       | 60       | 65       |
| Cover layer herb layer [%]                                                                                                                                                                                                                                                                                                                                                                                                                                                                                                                                                                                                                                                                                                                                                                                                                                                                                                                                          | 35       | 30       | 30       | 40       | 30       | 25       |
| Area [m2]                                                                                                                                                                                                                                                                                                                                                                                                                                                                                                                                                                                                                                                                                                                                                                                                                                                                                                                                                           | 100      | 100      | 100      | 100      | 100      | 100      |
| Date                                                                                                                                                                                                                                                                                                                                                                                                                                                                                                                                                                                                                                                                                                                                                                                                                                                                                                                                                                | 11.08.19 | 11.08.19 | 25.08.19 | 25.08.19 | 21.06.20 | 21.06.20 |
| Number of species                                                                                                                                                                                                                                                                                                                                                                                                                                                                                                                                                                                                                                                                                                                                                                                                                                                                                                                                                   | 20       | 18       | 14       | 16       | 19       | 15       |
| <p><i>I. Ch: a-Vaccinio-Piceetea; b-Cladonio-Vaccinietalia; c-Dicrano-Pinion; d-Quercus roboris-Pinetum</i></p> <p><i>a Trientalis europaea</i>   + + + . . .</p> <p><i>a Vaccinium myrtillus</i>   + 1 + + 1 1</p> <p><i>b Pinus sylvestris</i>   + + 1 1 3 2</p> <p><i>c Melampyrum pratense</i>   . . . + . .</p> <p><i>c Sorbus aucuparia</i>   1 1 + + . .</p> <p><i>d Quercus petraea</i>   + 1 + + + +</p> <p><i>d Viola reichenbachiana</i>   + + . . . .</p> <p><i>d Carex digitata</i>   . . + + . .</p> <p><i>d Carpinus betulus</i>   + + + + + +</p> <p><i>d Corylus avellana</i>   + + 1 1 + .</p> <p><i>d Euonymus verrucosa</i>   + + . . + +</p> <p><i>d Mycelis muralis</i>   . . . . + .</p> <p><i>d Quercus robur</i>   2 3 2 1 + 1</p> <p><i>II. Ch:a -Quercus-Fagetea; b-Fagetalia sylvaticae; c- Carpinion betuli; d- Alno-Ulmion</i></p> <p><i>a Acer platanoides</i>   + . + + . .</p> <p><i>a Aegopodium podagraria</i>   + + + + + +</p> |          |          |          |          |          |          |

|                                                                                                                                                                                                                                                    |   |   |   |   |   |   |
|----------------------------------------------------------------------------------------------------------------------------------------------------------------------------------------------------------------------------------------------------|---|---|---|---|---|---|
| <i>a Euonymus verrucosa</i>                                                                                                                                                                                                                        | . | . | . | + | . | . |
| <i>a Fraxinus excelsior</i>                                                                                                                                                                                                                        | + | + | . | . | + | . |
| <i>b Fagus sylvatica</i>                                                                                                                                                                                                                           | + | + | . | + | + | + |
| <i>b Milium effusum</i>                                                                                                                                                                                                                            | . | . | . | . | + | + |
| <i>c Tilia corDate</i>                                                                                                                                                                                                                             | . | . | + | + | . | . |
| <i>d Padus avium</i>                                                                                                                                                                                                                               | + | + | . | . | . | + |
| <i>III. Ch: Epilobietea angustifolii</i>                                                                                                                                                                                                           |   |   |   |   |   |   |
| <i>Calamagrostis epigejos</i>                                                                                                                                                                                                                      | . | . | . | . | + | . |
| <i>Chamaenerion angustifolium</i>                                                                                                                                                                                                                  | + | + | . | . | . | . |
| <i>IV. Other:</i>                                                                                                                                                                                                                                  |   |   |   |   |   |   |
| <i>Betula pendula</i>                                                                                                                                                                                                                              | + | . | . | . | 1 | 1 |
| <i>Geranium robertianum</i>                                                                                                                                                                                                                        | + | . | + | . | + | + |
| <i>Impatiens parviflora</i>                                                                                                                                                                                                                        | + | + | . | . | + | . |
| <i>Populus tremula</i>                                                                                                                                                                                                                             | + | + | . | . | + | + |
| <i>Galium boreale</i>                                                                                                                                                                                                                              | . | . | . | + | . | + |
| <i>Robinia pseudoacacia</i>                                                                                                                                                                                                                        | . | . | . | + | + | + |
| <i>Urtica dioica</i>                                                                                                                                                                                                                               | . | + | + | . | + | . |
| Occasional species: <i>IIC</i> - <i>Cerasus avium</i> +/1; <i>IV</i> - <i>Quercus rubra</i> +/3, <i>Arctium lappa</i> +/2, <i>Chelidonium majus</i> +/2, <i>Acer pseudoplatanus</i> +/6, <i>Picea pungens</i> +/2, <i>Veronica officinalis</i> +/1 |   |   |   |   |   |   |

## 25 - *Potentillo albae-Quercetum petraeae*

|                                 |     |     |
|---------------------------------|-----|-----|
| Community number                | 25  |     |
| Relevé number in table          | 1   | 2   |
| Relevé number                   | 113 | 114 |
| Cover tree and shrubs layer [%] | 70  | 70  |
| Cover layer herb layer [%]      | 60  | 70  |
| Area [m2]                       | 100 | 100 |

| Date                                                                                                                                     | 18.04.21 | 18.04.21 |
|------------------------------------------------------------------------------------------------------------------------------------------|----------|----------|
| Number of species                                                                                                                        | 16       | 15       |
| I. Ch: <i>a-Quercus-Fagetea</i> ; <i>b-Quercetalia pubescenti-petraeae</i> ; <i>d-Fagetalia sylvaticae</i> ; <i>e-Carpinion betuli</i> ; |          |          |
| <i>a Quercus robur</i>                                                                                                                   | 4        | 3        |
| <i>a Corylus avellana</i>                                                                                                                | 1        | +        |
| <i>a Euonymus verrucosa</i>                                                                                                              | +        | 1        |
| <i>a Anemone nemorosa</i>                                                                                                                | 1        | +        |
| <i>a Brachypodium sylvaticum</i>                                                                                                         | +        | +        |
| <i>a Carex digitata</i>                                                                                                                  | +        | .        |
| <i>a Poa nemoralis</i>                                                                                                                   | +        | 1        |
| <i>b Ulmus minor</i>                                                                                                                     | +        | +        |
| <i>d Galium odoratum</i>                                                                                                                 | 1        | +        |
| <i>d Milium effusum</i>                                                                                                                  | .        | +        |
| <i>d Padus avium</i>                                                                                                                     | +        | +        |
| <i>d Viola reichenbachiana</i>                                                                                                           | .        | +        |
| <i>e Carpinus betulus</i>                                                                                                                | +        | +        |
| <i>e Cerasus avium</i>                                                                                                                   | +        | .        |
| <i>e Tilia corDate</i>                                                                                                                   | +        | .        |
| <i>e Quercus petraea</i>                                                                                                                 | 1        | +        |
| II. Ch: <i>Vaccinio-Piceetea</i>                                                                                                         |          |          |
| <i>Pinus sylvestris</i>                                                                                                                  | +        | 1        |
| III: Other                                                                                                                               |          |          |
| <i>Geum urbanum</i>                                                                                                                      | .        | +        |
| <i>Sorbus aucuparia</i>                                                                                                                  | +        | .        |
| Occasional species: <i>III - Alnus glutinosa</i> +/1, <i>Populus tremula</i> +/1, <i>Quercus rubra</i> +/2, <i>Betula pendula</i> +/1    |          |          |

26 - *Tilio-Carpinetum*

| Community number                                                                            | 26       |          |          |          |          |          |
|---------------------------------------------------------------------------------------------|----------|----------|----------|----------|----------|----------|
| Relevé number in table                                                                      | 1        | 2        | 3        | 4        | 5        | 6        |
| Relevé number                                                                               | 20       | 46       | 58       | 59       | 107      | 108      |
| Cover tree and shrubs layer [%]                                                             | 60       | 60       | 70       | 60       | 80       | 80       |
| Cover layer herb layer [%]                                                                  | 20       | 30       | 20       | 20       | 15       | 25       |
| Area [m2]                                                                                   | 100      | 100      | 100      | 100      | 100      | 100      |
| Date                                                                                        | 25.08.19 | 21.06.20 | 28.06.20 | 28.06.20 | 18.04.21 | 18.04.21 |
| Number of species                                                                           | 19       | 16       | 15       | 20       | 16       | 17       |
| I. Ch: <i>a-Quercus-Fagetea</i> ; <i>b-Fagetalia sylvaticae</i> ; <i>c-Carpinion betuli</i> |          |          |          |          |          |          |
| <i>a Acer platanoides</i>                                                                   | .        | +        | +        | .        | .        | +        |
| <i>a Fraxinus excelsior</i>                                                                 | .        | .        | .        | +        | .        | .        |
| <i>a Quercus robur</i>                                                                      | 1        | +        | 1        | +        | 2        | 1        |
| <i>a Corylus avellana</i>                                                                   | 1        | +        | +        | +        | +        | +        |
| <i>a Euonymus europaea</i>                                                                  | +        | .        | .        | +        | +        | +        |
| <i>a Euonymus verrucosa</i>                                                                 | .        | .        | .        | +        | 1        | 1        |
| <i>a Anemone nemorosa</i>                                                                   | .        | +        | .        | +        | +        | +        |
| <i>a Aegopodium podagraria</i>                                                              | .        | .        | .        | .        | +        | +        |
| <i>a Brachypodium sylvaticum</i>                                                            | +        | +        | .        | .        | +        | +        |
| <i>a Poa nemoralis</i>                                                                      | +        | .        | .        | +        | .        | .        |
| <i>b Acer pseudoplatanus</i>                                                                | .        | +        | +        | .        | .        | .        |
| <i>b Asarum europaeum</i>                                                                   | +        | .        | .        | +        | .        | .        |
| <i>b Galium odoratum</i>                                                                    | +        | .        | +        | .        | +        | +        |
| <i>b Milium effusum</i>                                                                     | .        | +        | +        | +        | .        | .        |
| <i>b Padus avium</i>                                                                        | +        | +        | .        | +        | .        | .        |
| <i>b Viola reichenbachiana</i>                                                              | +        | +        | .        | .        | +        | +        |
| <i>c Carpinus betulus</i>                                                                   | 3        | 2        | 1        | 2        | 3        | 3        |
| <i>c Quercus petraea</i>                                                                    | 1        | +        | +        | +        | +        | 1        |

|                                                                                                                                                              |   |   |   |   |   |   |
|--------------------------------------------------------------------------------------------------------------------------------------------------------------|---|---|---|---|---|---|
| <i>c Tilia corDate</i>                                                                                                                                       | + | . | + | 1 | 1 | + |
| <i>c Cerasus avium</i>                                                                                                                                       | + | . | + | . | + | + |
| <i>c Stellaria holostea</i>                                                                                                                                  | 1 | + | 1 | 1 | . | + |
| II. Ch: <i>Vaccinio-Piceetea</i>                                                                                                                             |   |   |   |   |   |   |
| <i>Pinus sylvestris</i>                                                                                                                                      | + | + | + | + | + | + |
| III. Ch: <i>Epilobietea angustifolii</i>                                                                                                                     |   |   |   |   |   |   |
| <i>Betula pendula</i>                                                                                                                                        | 1 | 1 | + | + | . | . |
| <i>Geranium robertianum</i>                                                                                                                                  | + | . | + | . | + | + |
| <i>Populus tremula</i>                                                                                                                                       | + | + | . | + | . | . |
| IV: Other                                                                                                                                                    |   |   |   |   |   |   |
| <i>Sorbus aucuparia</i>                                                                                                                                      | . | . | . | + | + | . |
| <i>Urtica dioica</i>                                                                                                                                         | + | + | . | + | . | . |
| <i>Impatiens parviflora</i>                                                                                                                                  | + | . | . | + | . | . |
| <i>Solanum dulcamara</i>                                                                                                                                     | . | . | + | + | . | . |
| Occasional species: Ia - <i>Acer campestre</i> +/4, IV - <i>Fagus sylvatica</i> +/1, <i>Quercus rubra</i> +/2, <i>Picea abies</i> +/3, <i>Salix alba</i> r/4 |   |   |   |   |   |   |
